1 **A comparative study of ‘safe and just operating space’ for the south and south-east**

2 **Asian countries**

3 Ajishnu Roy<sup>1</sup>, Kousik Pramanick\*

4 <sup>1</sup>Integrative Biology Research Unit, Department of Life Sciences,

5 Presidency University, 86/1 College Street Kolkata – 700076

6 Email: [ajishnu.rs@presiuniv.ac.in](mailto:ajishnu.rs@presiuniv.ac.in)

7 <sup>1</sup>ORCID: 0000-0001-9494-3963

8 \*Corresponding Author

9 Integrative Biology Research Unit, Department of Life Sciences,

10 Presidency University, 86/1 College Street Kolkata – 700076

11 Email ID: [kousik.dbs@presiuniv.ac.in](mailto:kousik.dbs@presiuniv.ac.in)

12 \*ORCID: 0000-0003-1822-4646

13 **Abstract:**

14 The world is presently maintaining a delicate balance of continuing well-being and social  
15 development for the people through consumption of biophysical resources of nature without  
16 topping global average per capita availability. In this paper, we have framed a per capita top-  
17 down framework to survey national ‘safe and just operating space’ (NSJOS) for the countries  
18 of south and southeast Asia to understand past variations and as a consequence, the present  
19 scenario. Amalgamating 27 indicators, all regarding Sustainable Development Goals (except  
20 – SDG 17), in consort with their respective environmental boundaries or desirable social  
21 development thresholds, this study explores into both biophysical (for ecological stress) and  
22 social development (for social deprivation) attributes of 19 countries of south and southeast

23 Asia. This analysis shows, only 2 have remained either unchanged (political voice) or  
24 declining (social equity) among the 12 dimensions of social development in countries of this  
25 region. The remaining 10 dimensions of social development showing positive progress and  
26 will meet corresponding desired thresholds of United Nations Sustainable Development  
27 Goals 2015. All the 7 indicators showing tendencies of overconsumption of biophysical  
28 resources, that might be leading to exceeding per capita global average planetary boundaries  
29 in forthcoming future. However, ecological boundaries have remained protected to a decent  
30 degree so far for these countries. The challenge would be to maintain and increase the pace of  
31 social development and bringing it in equal strata of a global standard in future without  
32 depleting drivers of these, i.e. biophysical resources. National policy adaptations are crucial if  
33 these countries of south and southeast Asia desire to bring about adequacy in biophysical  
34 resources reserve whilst granting social equity in access and exploitation of these resources  
35 for the people towards the persistent social development in impending decades.

36 **Keywords:** Sustainable development goals; planetary boundaries; doughnut economy; safe  
37 and just operating space; national scale; South and Southeast Asia;

38

39

40

41

42

43

44

45

46 **Introduction:**

47 The era, ‘Anthropocene’, symbolizes the scenario where anthropogenic drivers have become  
48 overriding forces of multifaceted changes in the Earth system (Steffen et al., 2007, 2011).  
49 This situation calls upon a comprehensive scientific understanding of biophysical (i.e.  
50 environmental) and socioeconomic interactions and concerned adaptive policy responses of  
51 local, regional, national to global decisions and development trajectories which might have  
52 unsustainable systemic multiscale adverse effects. The concept of sustainable development  
53 emerged for this context, that is “development that meets the needs of the present without  
54 compromising the ability of future generations to meet their own needs” (Brundtland  
55 Report, 1987). Agenda 21 (UNCED, Earth Summit, 1992) advised for sustainable  
56 development indicators (SDIs) to “provide solid bases for decision-making at all levels and to  
57 contribute to a self-regulating sustainability of integrated environment and development  
58 system”. 17 Sustainable Development Goals (SDGs) and 169 targets, ascended from  
59 Millennium Development Goals (MDGs) (Sachs, 2012) in 2015 by United Nations. These  
60 SDGs incorporate all 3 pillars of sustainable development, i.e. environmental goals (climate  
61 action, life below water, life on land etc.), economic goals (reduced inequalities, decent work  
62 and economic growth etc.) and social goals (zero hunger, no poverty, gender equality, peace  
63 and justice and strong institutions etc.). Two chief approaches have surfaced to quantified  
64 understanding of sustainability, (1) planetary boundaries (PBs) and (2) doughnut economy  
65 (DE), combining together forming safe and just operating space (SJS) framework. Rockström  
66 et al. introduced a new concept, ‘planetary boundaries’ framework, in 2009, to determine  
67 environment (i.e. ecological) thresholds and evaluate degree of consumption of nine  
68 biophysical resources that might prove to be hazardous to various Earth-system processes  
69 (climate change, rate of biodiversity loss, nitrogen and phosphorus cycles, stratospheric  
70 ozone depletion, ocean acidification, global freshwater use, change in land use, atmospheric

71 aerosol loading and chemical pollution) (Rockström et al. 2009a, Rockström et al. 2009b) .  
72 This framework (change in biosphere integrity, land-system change, the introduction of novel  
73 entities) was revised by Steffen et al. (2015). Dearing et al.'s (2014) defined ecological  
74 processes and control variables based on local environmental conditions of study locations,  
75 with a case study of two Chinese localities (Erhai lake-catchment, Yunnan province and  
76 Shucheng County, Anhui province, China). Nykvist et al. (2013) devised a methodology to  
77 determine national shares of four planetary boundaries (climate change, freshwater use, land-  
78 system change, and nitrogen), for 61 countries. Europe's footprint was calculated by Hoff et  
79 al. (2014) with the PB framework. Dao et al. (2015) have analysed the sustainability of  
80 Switzerland through the PB framework. Nitrogen and phosphorus boundaries of Ethiopia and  
81 Finland was assessed by Kahiluoto et al. (2015). The planetary boundary of phosphorus was  
82 improved by Carpenter and Bennett (2011). Dao et al. (2018) have recently calculated the  
83 environmental limits of Switzerland accompanied with global limits, based on the PB  
84 framework. They have analysed PBs related to climate change, ocean acidification, nitrogen  
85 and phosphorus loss, land cover anthropisation and biodiversity loss. In a more recent report,  
86 Häyhä et al. (2018) have analysed the scope of safe operating space for countries in the  
87 European Union with the PB framework. They have incorporated six of nine indicators of PB  
88 (climate change, land system change, biogeochemical flows – nitrogen and phosphorus,  
89 freshwater use, biosphere integrity and novel entities). Parallely, Raworth devised 11  
90 dimensions of social foundation (water, income, education, resilience, voice, jobs, energy,  
91 social equity, gender equality, health and food), based on UNCSD (Rio+20, 2012) (Raworth,  
92 2012). It was updated in 2017 to 12 dimensions (food, health, education, income and work,  
93 peace and justice, political voice, social equity, gender equality, housing, networks, energy,  
94 water) (Raworth, 2017a, 2017b). Cole et al. (2014) analysed the sustainable development of  
95 South Africa as 'national barometer' that included both planetary boundaries and doughnut

96 economy frameworks with a culmination of both top-down and bottom-up approaches. They  
97 had modified few indicators from both frameworks (arable land use, air pollution and marine  
98 harvesting under the PB framework; health care, household goods, safety of SJS framework).  
99 O'Neill et al. (2018) have also downscaled these two frameworks towards national level  
100 analysis of 150 nations along with new indicators (e.g. eHANPP, ecological footprint,  
101 material footprint, life satisfaction, healthy life expectancy, nutrition, social support,  
102 democratic quality etc.). The recent Paris climate agreement advocates for an objective  
103 towards keeping global average temperature increase well below 2 degrees Celsius, if  
104 possible, to remain within 1.5 degrees Celsius for avoiding worst impacts. These objectives  
105 are needed to be achieved by the aggregate effects of national actions as Nationally  
106 Determined Contributions (NDCs). UN Convention on Biological Diversity (CBD) and UN  
107 Convention to Combat Desertification (UNCCD), both determine the necessary response at  
108 country level. These indicate to the significance of national-scale analysis. Our analysis  
109 measures the national-level performance of countries of south and southeast Asia on 28  
110 dimensions, (both PB and SJS frameworks) and provides important outcomes concerning  
111 biophysical resource consumption and well-being for these countries. We have tried to  
112 understand how close these countries of south and southeast Asia have changed in their  
113 respective 'safe' ecological boundaries (i.e. national-level biophysical ceilings) (climate  
114 change, freshwater use, arable land use, nitrogen use, phosphorus use, ecological and material  
115 footprint) and how much of the population are socially deprived i.e. below 'just' social floor  
116 (i.e. national-level social foundations) (education, energy, food, gender equality, health,  
117 housing, income and work, networks, peace and justice, political voice, social equity, water  
118 and sanitation). This multinational analysis can yield a comparative overview of national-  
119 scale scenario so that every nation can comprehend which and where to focus enabling to  
120 meet UN SDG 2015 criteria.

121 **Data and Method:**

122 **a. Biophysical Indicators:**

123 We have used Rockström et al.'s (2009b) and Steffen et al.'s (2015) approach of planetary  
124 boundaries framework, with adjustment for all of the indicators and boundaries to fit national  
125 scale. Five indicators have been used from updated planetary boundaries framework of  
126 Steffen et al. (2015) (viz. climate change, nitrogen flow, phosphorus flow, land-system  
127 change and freshwater use) and two indicators from O'Neill et al.'s (2018) (ecological and  
128 material footprint).

129 **Climate change:** According to Rockström et al. (2009b), climate change boundary is based  
130 on global 'atmospheric carbon dioxide concentration (parts per million by volume)' and  
131 'change in radiative forcing i.e. energy imbalance at top-of-atmosphere ( $\text{W m}^{-2}$ )'. For this  
132 dimension, Cole et al. (2014) used 'annual direct  $\text{CO}_2$  emissions ( $\text{Mt CO}_2$ )' and O'Neill et al.  
133 (2018) used annual per capita  $\text{CO}_2$  emission ( $\text{t CO}_2$ ). We have measured this with greenhouse  
134 gas emission per capita per year. As per Emissions Gap Report (UNEP, November 2017),  
135 'emissions of all greenhouse gases should not exceed  $42 \text{ GtCO}_2\text{-e}$  in 2030 if the  $2^\circ\text{C}$  target is  
136 to be attained with higher than 66 per cent chance.' This  $42 \text{ GtCO}_2\text{-e}$  is divided with the  
137 global population to get per global capita scale boundary of  $5.75 \text{ tCO}_2\text{-e year}^{-1}$  (2014).

138 **Freshwater use:** The Planetary boundary of freshwater use is the maximum withdrawal of  
139  $4000 \text{ km}^3 \text{ y}^{-1}$  blue water from rivers, lakes, reservoirs, and renewable groundwater stores  
140 (Rockström et al., 2009b). Though Steffen et al. (2015) and O'Neill et al. (2018) followed  
141 this estimate, 'annual consumption of available freshwater resources ( $\text{Mm}^3$  per year)' has  
142 been used to measure this planetary boundary dimension by Cole et al. (2014).  $4000 \text{ km}^3 \text{ y}^{-1}$   
143 water is divided with the global population to get global average per capita scale boundary of  
144  $574.86 \text{ km}^3 \text{ y}^{-1}$  (2010).

145 **Arable land use:** The planetary boundary of land use is less than 15% of global ice-free land  
146 cover converted to cropland per year (which is 1995 Mha) (Rockström et al., 2009b). Steffen  
147 et al. (2015) have used ‘area of forested land as % of original forest cover’ and advised to  
148 maintain of 75% of global original forest cover, as a minimum (for tropical, temperate and  
149 boreal 85%, 50% and 85%, resp.). ‘Rain-fed arable land converted to cropland (%)’ has been  
150 used by Cole et al. (2014). O’Neill et al. (2018) have used ‘embodied human appropriation of  
151 net primary productivity (eHANPP)’ (ton Carbon per capita per year). For our analysis, we  
152 have divided 1995 Mha with the global population to get global average per capita scale land  
153 use boundary of  $0.27\text{ha year}^{-1}$  (2015).

154 **Nitrogen use:** This boundary was measured with ‘amount of  $\text{N}_2$  removed from the  
155 atmosphere for human use (millions of tonnes  $\text{y}^{-1}$ )’ (which was 35 million tonnes  $\text{y}^{-1}$ )  
156 (Rockström et al., 2009b). According to Steffen et al. (2015), from industrial and intentional  
157 biological fixation, the planetary boundary of global N flow is 62 Tg N per year. O’Neill et  
158 al. (2018) have also used Steffen et al.’s (2015) method for their analysis. Cole et al. (2014)  
159 have used ‘nitrogen application rate of maize production ( $\text{kg N ha}^{-1}$ )’. We have divided 62 Tg  
160  $\text{N y}^{-1}$  with the global population to get the global average per capita scale boundary of  $8.4\text{kg}$   
161  $\text{N year}^{-1}$  (2015).

162 **Phosphorus use:** This boundary was measured in terms of ‘quantity of phosphorus flowing  
163 into the ocean (millions of tonnes  $\text{y}^{-1}$ )’ (i.e. global boundary of 11 million tonnes  $\text{y}^{-1}$ )  
164 (Rockström et al., 2009b). However, according to Steffen et al. (2015), the planetary  
165 boundary of global phosphorus flow (mined and applied to erodible or agricultural soils) is  
166  $6.2\text{ Tg N y}^{-1}$ . O’Neill et al. (2018) followed Steffen et al.’s (2015) method for this. Cole et al.  
167 (2014) used ‘total phosphorus concentration in dams ( $\text{mg/L}$ )’ as an indicator. We have  
168 divided  $6.2\text{ Tg N y}^{-1}$  with the global population to get the global average per capita scale  
169 boundary of  $0.84\text{kg P year}^{-1}$  (2015).

170 **Ecological footprint (EF):** Ecological footprint is an indicator to measure how much  
 171 biologically productive land and sea area a population requires to produce the biotic  
 172 resources it consumes as well as absorb the CO<sub>2</sub> emissions it generates, using prevailing  
 173 technology and resource management practices (Borucke et al., 2013). It has been first used  
 174 in the context of the planetary boundaries' framework by O'Neill et al. (2018). According to  
 175 Global Footprint Network (GFN), the world has 12 billion ha biologically productive land  
 176 and sea area. We have divided 12 billion ha with the global population to get the global  
 177 average per capita scale boundary of 1.66gha year<sup>-1</sup> (2013).

178 **Material footprint (MF):** Material footprint (also called Raw Material Consumption, RMC)  
 179 is used to measure the amount of used material extraction (minerals, fossil fuels, and  
 180 biomass) associated with the final demand for goods and services, irrespective of the location  
 181 of the extraction (Wiedmann et al., 2015). It includes the embodied raw materials related to  
 182 trade (both imports and exports) and thus, a suitable consumption-based measure. Global  
 183 material footprint has been estimated at 70 Gt y<sup>-1</sup> (i.e. 10.5 ton per capita in the year 2008, by  
 184 Wiedmann et al. 2015), and it was capped to 8 ton per capita as a sustainable level, has been  
 185 suggested by Dittrich et al. (2012). Global material extraction should not exceed ~50 Gt y<sup>-1</sup>,  
 186 based on the material used in 2000 (50.8 Gt) (Dittrich et al., 2012). We have divided 50 Gt y<sup>-1</sup>  
 187 with the global population to get the global average per capita scale boundary of 7.18t year<sup>-1</sup>  
 188 (2010).

189 These dimensions (with respective indicators, boundaries, year, number of countries and data  
 190 source) are explained in Table 1.

| No. | Dimension<br>(related SDG) | Indicator<br>Measurement | of<br>Boundary<br>(global, per<br>capita) | Year                     | N     | Data<br>Source |         |
|-----|----------------------------|--------------------------|-------------------------------------------|--------------------------|-------|----------------|---------|
| 1   | Climate                    | GHG                      | emissions                                 | 5.75t CO <sub>2</sub> -e | 1990- | 18             | Climate |



|   |                                        |                                                                                   |                                                |           |    |                                 |
|---|----------------------------------------|-----------------------------------------------------------------------------------|------------------------------------------------|-----------|----|---------------------------------|
|   | change (SDG 13)                        | including Land-Use Change and Forestry (t CO <sub>2</sub> -e) Per Capita Per Year | year <sup>-1</sup> (2014)                      | 2014      |    | Analysis Indicators Tool (CAIT) |
| 2 | Freshwater use (SDG 6)                 | Total water withdrawal (m <sup>3</sup> ) Per Capita Per Year                      | 574.86m <sup>3</sup> year <sup>-1</sup> (2010) | 1973-2012 | 19 | Aquastat                        |
| 3 | Arable land use (SDG 15)               | Arable land area (ha) Per Capita Per Year                                         | 0.27ha year <sup>-1</sup> (2015)               | 1961-2015 | 19 | FAOSTAT, World Bank             |
| 4 | Nitrogen use (SDG 14)                  | Nutrient nitrogen N use (kg) Per Capita Per Year                                  | 8.4kg N year <sup>-1</sup> (2015)              | 2002-2015 | 17 | FAOSTAT                         |
| 5 | Phosphorus use (SDG 14)                | Nutrient phosphate P <sub>2</sub> O <sub>5</sub> (kg) Per Capita Per Year         | 0.84kg P year <sup>-1</sup> (2015)             | 2002-2015 | 17 | FAOSTAT                         |
| 6 | Ecological footprint (EF) (SDG 14, 15) | Ecological footprint (gha) Per Capita Per Year                                    | 1.66gha year <sup>-1</sup> (2013)              | 1961-2013 | 17 | Global Footprint Network (GFN)  |
| 7 | Material footprint (MF) (SDG 12)       | Material footprint (t) Per Capita Per Year                                        | 7.18t year <sup>-1</sup> (2010)                | 2000-2010 | 17 | UNData (UNSD)                   |

192 Table 1: Dimensions and indicators of the ecological ceiling, related to safe operating space  
193 (SOS) of the Planetary boundaries concept.

194 **b. Social development Indicators:**

195 We followed Raworth's (2017a) framework consisting of 12 dimensions related to social  
196 deprivation.

197 **Education:** SDG 4 aims at ensuring inclusive and equitable quality education and promotion  
198 of lifelong learning opportunities for all. 3 indicators have been selected from primary,  
199 secondary and adult education (literacy rate of adults, children of primary school age  
200 remained in school and secondary school enrollment) to reflect achievements and outcomes  
201 across diverse population age groups. Children out of school are the percentage of primary-  
202 school-age children who are not enrolled in primary or secondary school. Children in the  
203 official primary age group that are in pre-primary education should be considered out of  
204 school. The adult literacy rate is the percentage of people ages 15 and above who can both  
205 read and write with understanding a short simple statement about their everyday life. Gross  
206 enrollment ratio is the ratio of total enrollment, regardless of age, to the population of the age  
207 group that officially corresponds to the level of education shown. Secondary education  
208 completes the provision of basic education that began at the primary level and aims at laying  
209 the foundations for lifelong learning and human development, by offering more subject- or  
210 skill-oriented instruction using more specialized teachers. We have used the data from the  
211 World Bank's World Development Indicators (WDI). A threshold of 10% or less has been  
212 chosen for children out of the school of primary school age and 90% or more was chosen for  
213 secondary school enrollment and adult literacy rate.

214 **Energy:** SDG 7 aims to ensure access to affordable, reliable, sustainable and clean energy for  
215 all. About 1 billion people currently do not have access to electricity. 3 billion people rely on  
216 polluting fuel (like – fuelwood, charcoal, crop residue, animal dung, dry leaves) to cook food,

217 which in turn resulting in 4 million premature deaths per year, mostly among women and  
218 children, that are due to household air pollution (SDG 7 tracking report, 2018). Our  
219 assessment of deprivations in access to energy includes both electricity and the quality of  
220 (clean) cooking facilities. We have measured energy using two indicators, (1) ‘access to  
221 electricity (% of populations)’ and (2) ‘access to clean fuels and technologies for cooking (%  
222 of the population)’, obtained from the World Bank’s WDI. Access to electricity is the  
223 percentage of the population with access to electricity. Access to clean fuels and technologies  
224 for cooking is the proportion of total population primarily using clean cooking fuels and  
225 technologies for cooking. Under WHO guidelines, kerosene is excluded from clean cooking  
226 fuels. The threshold for energy was set at 90% or more for both indicators.

227 **Food:** The target of SDG 2 is ending hunger, achieving food security and improved nutrition  
228 for all. We measured social development related to food using two indicators, (1) ‘average  
229 calorific intake of food & drink (kcal/capita/day)’ and (2) ‘prevalence of undernourishment  
230 (% of the population)’. Daily caloric supply is defined as the average per capita caloric  
231 availability. This indicates the caloric availability delivered to households but does not  
232 necessarily indicate the number of calories actually consumed (food may be wasted at the  
233 consumer level). The physiological requirements for an average adult remain between 2100  
234 and 2900 kcal per day (for average men and women with moderate physical activity). This  
235 calorific requirement range exceeds for individuals associated with heavy manual labour or  
236 athletic activity (Smil, 2000). We have followed O’Neill et al. (2018) and used 2700 kcal or  
237 more per capita day<sup>-1</sup> as a threshold. Population below minimum level of dietary energy  
238 consumption (also referred to as prevalence of undernourishment) shows the percentage of  
239 the population whose food intake is insufficient to meet dietary energy requirements  
240 continuously.

241 **Gender Equality:** The focus of SDG 5 is achieving gender equality via empowering all  
242 women. It would be ideal to assess the extent of gender inequality to understand women and  
243 men's roles and status in political and economic life. We measured this using one indicator -  
244 'proportion of seats held by women in national parliaments (%)' from the World Bank's  
245 World Development Indicators. Women in parliaments are the percentage of parliamentary  
246 seats in a single or lower chamber held by women. The indicator value is calculated such that  
247 if women held exactly half of all parliamentary seats (i.e. 50%), that should be non-biased to  
248 both genders. Thus, achieving 50% seats in parliament has been taken as the desired  
249 threshold.

250 **Health:** Ensuring healthy lives and promoting well-being for all at all ages is the focus of  
251 SDG 3. We have used two indicators to assess shortfalls in access to health care in India: (1)  
252 'life expectancy at birth, total (years)' and (2) 'mortality rate, <5 years (per 1,000 live births)'  
253 from the World Bank's WDI. Life expectancy at birth indicates the number of years a  
254 newborn infant would live if prevailing patterns of mortality at the time of its birth were to  
255 stay the same throughout its life. Seventy years or more life expectancy at birth is selected  
256 here as a desirable threshold (Human Development Report, UNDP, 2015). The under-five  
257 mortality rate is the probability per 1,000 that a newborn baby will die before reaching age  
258 five, if subject to age-specific mortality rates of the specified year. The international target for  
259 all countries to reduce under-five years age mortality to at least as low as 25 per 1,000 live  
260 births by 2030 (WHO, 2015). Thus, 25 or less per 1000 live births has been set as the desired  
261 threshold here.

262 **Housing:** SDG 11 focus on making cities and human settlements inclusive, safe, resilient and  
263 sustainable. We have measured it with 'population living in slums (% of urban population)'  
264 from WDI (World Bank). Population living in slums is the proportion of the urban population  
265 living in slum households. A slum household is defined as a group of individuals living under

266 the same roof lacking one or more of the following conditions: lack of access to improved  
267 drinking water, lack of access to improved sanitation, overcrowding (>3 persons per room)  
268 and dwellings made of non-durable material. We have set the threshold at 10% or less of  
269 urban population living in slums.

270 ***Income and Work:*** SDG 1 focus on ending poverty in all its forms everywhere. Promoting  
271 sustained, inclusive, sustainable economic growth full and productive employment and  
272 decent work for all is the goal of SDG 8. We have used (1) ‘poverty headcount ratio at \$1.90  
273 a day (2011 PPP) (% of the population)’ to measure income and (2) ‘unemployment, youth  
274 total (% of total labour force, 15-24 years)’ for work, both from WDI (World Bank). Poverty  
275 headcount ratio at \$1.90 a day is the percentage of the population living on less than \$1.90 a  
276 day at 2011 international prices. Though the goal is having 100% of the population living  
277 above the \$1.90 a day line, we have used 95% as a threshold value in this analysis. Youth  
278 unemployment refers to the share of the labour force ages 15-24 years without work, though  
279 available for and seek employment (International Labour Organization, ILO estimation). We  
280 have used 94% or more people are employed (i.e. 6% or less unemployed people below this  
281 line) is the desired threshold.

282 ***Networks:*** SDG 9 focus on building resilient infrastructure, promoting inclusive and  
283 sustainable industrialization and fostering innovation. Under this goal, target 9.c. focus on  
284 significantly increasing access to information and communications technology and strive to  
285 provide universal and affordable access to the Internet in the least developed nations. The  
286 network has been measured with ‘individuals using the internet (% of the population)’  
287 provided by WDI of the World Bank. Internet users are individuals who have used the  
288 Internet (from any location) in the last 3 months. The Internet can be used via a computer,  
289 mobile phone, personal digital assistant, games machine, digital TV etc. We have used 90%  
290 or more of the population have access to the internet as the desired threshold.

291 ***Peace & Justice:*** UN SDG 16 focus on promoting peaceful and inclusive societies for  
292 sustainable development, provide access to justice for all and build effective, accountable and  
293 inclusive institutions at all levels. We used two indicators (1) corruption perceptions index  
294 (CPI) for justice, (provided by Transparency International) and (2) ‘intentional homicides  
295 (per 100,000 people)’ (from WDI) for peace. Corruption perceptions index scores countries  
296 according to how corrupt their public sector is perceived to be, i.e. highly corrupt to very  
297 clean [scale: 0 to 10 (up to 2011) and 0 to 100 (2012 onwards)]. We have set the desired  
298 threshold of 5 or less (up to 2011) and 50 or less (2012 onwards). Intentional homicides are  
299 estimates of unlawful homicides purposely inflicted as a result of domestic disputes,  
300 interpersonal violence, violent conflicts over land resources, intergang violence over turf or  
301 control, and predatory violence and killing by armed groups. It does not include all  
302 intentional killing. Individuals or small groups usually commit homicide, whereas killing in  
303 armed conflict is usually committed by fairly cohesive groups of up to several hundred  
304 members and is thus usually excluded. We have set the threshold at 10 or fewer homicide  
305 deaths per 100,000 population per year.

306 ***Political Voice:*** Under SDG 16, target 16.7 aims for ensuring responsive, inclusive,  
307 participatory and representative decision-making at all levels. We have measured political  
308 voice using voice & accountability index (VAI), provided as a component of the World  
309 Bank’s World Governance Indicators (WGI). Voice and accountability capture perceptions  
310 of the extent to which a country’s citizens are able to participate in selecting their  
311 government, as well as freedom of expression, freedom of association, and a free media. This  
312 index is scored on a scale of 0 to 1 (i.e. very poor performance to very high performance).  
313 The threshold is set at 0.5 or less on this indicator.

314 ***Social Equity:*** SDG 10 focus on reducing inequality within and among the countries. The  
315 shortfall of social equity is measured with national income inequalities. We have measured

316 social equity using the Gini coefficient of per capita expenditure, provided by the UNU-  
317 WIDER, World Income Inequality Database 3.4 (WIID 3.4) (Jan, 2017). Gini index measures  
318 the extent to which the distribution of income (or, in some cases, consumption expenditure)  
319 among individuals or households within an economy deviates from a perfectly equal  
320 distribution. A Gini index of 0 represents perfect equality, while an index of 100 implies  
321 perfect inequality. The threshold was chosen of 70 of 0-100 scale of Gini index of 0.30.

322 ***Water & Sanitation:*** SDG 6 focus on ensuring availability and sustainable management of  
323 water and sanitation for all. Deprivations in access to water and sanitation services are  
324 assessed on the basis of two widely used indicators, (1) ‘improved sanitation facilities (% of  
325 the population with access)’ and (2) ‘improved water source (% of the population with  
326 access)’ from the World Bank's WDI. Access to improved sanitation facilities refers to the  
327 percentage of the population using improved sanitation facilities. Improved sanitation  
328 facilities are likely to ensure hygienic separation of human excreta from human contact. They  
329 include flush/pour flush (to the piped sewer system, septic tank, pit latrine), ventilated  
330 improved pit (VIP) latrine, pit latrine with slab, and composting toilet. Although it is  
331 preferable that 100% of the population should have access to improved sanitation facilities,  
332 we have chosen a threshold of 90% for this indicator. Access to an improved water source  
333 refers to the percentage of the population using an improved drinking water source. The  
334 improved drinking water source includes piped water on premises (piped household water  
335 connection located inside the user’s dwelling, plot or yard), and other improved drinking  
336 water sources (public taps or standpipes, tube wells or boreholes, protected dug wells,  
337 protected springs, and rainwater collection). We have set the threshold for this indicator as  
338 90% or more people have access (i.e. 10 or fewer people do not have access) to an improved  
339 water source.

340 These dimensions (with respective indicators, boundaries, year, number of countries and data  
 341 source) are explained in Table 2.

| No. | Dimension            | Indicator   | of                                                                       | Threshold                                                              | Year      | N  | Data Source |
|-----|----------------------|-------------|--------------------------------------------------------------------------|------------------------------------------------------------------------|-----------|----|-------------|
|     |                      | Measurement |                                                                          |                                                                        |           |    |             |
| 1   | Education<br>(SDG 4) | i.          | Children out of school (% of primary school age)                         | ≤10% children out of school                                            | 1970-2017 | 19 | WDI         |
|     |                      | ii.         | Literacy rate, adult total (% of people ages ≥15 years)                  | ≥90% literate of adult population                                      | 1977-2016 | 19 | WDI         |
|     |                      | iii.        | School enrollment, secondary (% gross)                                   | ≥90% enrollment in secondary school                                    | 1970-2016 | 18 | WDI         |
| 2   | Energy<br>(SDG 7)    | iv.         | Access to Electricity (Populations)                                      | ≥90% people have electricity access                                    | 1990-2016 | 19 | WDI         |
|     |                      | v.          | Access to clean fuels and technologies for cooking (% of the population) | ≥90% of people have access to clean fuels and technologies for cooking | 2000-2016 | 19 | WDI         |



|   |                             |       |                                                               |                                                    |           |    |             |
|---|-----------------------------|-------|---------------------------------------------------------------|----------------------------------------------------|-----------|----|-------------|
| 3 | Food<br>(SDG 2)             | vi.   | Average calorific intake of food & drink (kcal/capita/day)    | $\geq 2700$ calories per person per day            | 1961-2013 | 18 | FAOST<br>AT |
|   |                             | vii.  | Prevalence of undernourishment (% of population)              | $\leq 5\%$ people of population are undernourished | 2000-2015 | 17 | WDI         |
| 4 | Gender Equality<br>(SDG 5)  | viii. | Proportion of seats held by women in national parliaments (%) | 50% of seats held by women in national parliaments | 1997-2017 | 19 | WDI         |
| 5 | Health<br>(SDG 3)           | ix.   | Life expectancy at birth, total (years)                       | Life expectancy $\geq 70$ years at birth           | 1960-2016 | 19 | WDI         |
|   |                             | x.    | Mortality rate, <5 years (per 1,000 live births)              | Mortality rate $\leq 25$ per 1000 births           | 1960-2016 | 19 | WDI         |
| 6 | Housing<br>(SDG 11)         | xi.   | Population living in slums (% of urban population)            | $\leq 10\%$ of population living in slums          | 1990-2014 | 14 | WDI         |
| 7 | Income<br>(SDG 1)<br>& Work | xii.  | Poverty headcount ratio at \$1.90 a day (2011 PPP) (% of      | $\leq 5\%$ people earn less than \$1.90 per day    | 1981-2016 | 15 | WDI         |

|    |                            |        |                                                            |                                                                                         |           |    |                                 |
|----|----------------------------|--------|------------------------------------------------------------|-----------------------------------------------------------------------------------------|-----------|----|---------------------------------|
|    | (SDG 8)                    |        | population)                                                |                                                                                         |           |    |                                 |
|    |                            | xiii.  | Unemployment, youth total (% of total labour force 15-24y) | ≥94% employment (≤6% unemployment)                                                      | 1991-2017 | 19 | WDI                             |
| 8  | Networks (SDG 9.c)         | xiv.   | Individuals using the Internet (% of population)           | ≥90% people of population use internet                                                  | 1990-2016 | 19 | WDI                             |
| 9  | Peace & Justice (SDG 16)   | xv.    | Corruption Perceptions Index (CPI)                         | Score ≤5 out of 10 in CPI (up to 2011), Score ≤50 out of 100 in CPI (from 2012 onwards) | 1995-2015 | 19 | Transparency International (TI) |
|    |                            | xvi.   | Intentional homicides (per 100,000 people)                 | Homicide rate ≤10                                                                       | 1995-2015 | 19 | WDI                             |
| 10 | Political Voice (SDG 16.7) | xvii.  | Voice & Accountability Index (VAI)                         | Score ≥0.5 out of 1.0 in VAI                                                            | 1996-2016 | 19 | WGI                             |
| 11 | Social Equity              | xviii. | Gini index                                                 | ≥70 on (0-100) scale on                                                                 | 1981-2015 | 15 | WIID 3.4                        |

|    |                                  |      |                                                                       |                                                                       |               |    |     |
|----|----------------------------------|------|-----------------------------------------------------------------------|-----------------------------------------------------------------------|---------------|----|-----|
|    | (SDG 10)                         |      |                                                                       | GINI index of<br>0.30                                                 |               |    |     |
| 12 | Water &<br>Sanitation<br>(SDG 6) | xix. | Improved<br>sanitation facilities<br>(% of population<br>with access) | ≥90% people<br>have access to<br>improved<br>sanitation<br>facilities | 1990-<br>2015 | 19 | WDI |
|    |                                  | xx.  | Improved water<br>source (% of the<br>population with<br>access)      | ≥90% of<br>people have<br>access to<br>improved<br>water resource     | 1990-<br>2015 | 18 | WDI |

342

343 Table 2: Dimensions and indicators of the social foundation, related to safe and Just space  
344 (SJS) of Doughnut economy concept.

345 **Results:**

346 **a. Biophysical Indicators:**

347 *Climate change:*

348 Global average per capita GHG emission had crossed climate change PB in 2005 and  
349 stayed ahead since then. Among 18 countries, 4 has already crossed climate change PB  
350 (Brunei, Indonesia, Singapore and Malaysia, in highest to lowest order of per capita GHG  
351 emission) and 5 are on the way to cross Climate change PB within a few years (Thailand,  
352 Laos, Myanmar, Maldives and Cambodia, in highest to lowest order of GHG emission). Only  
353 one country, Bhutan has shown negative GHG emission per capita, but its GHG absorbing

354 capacity has been decreasing over the years. Remaining 8 countries are within the safe limits  
355 of climate change PB. Also, among 18 countries, 5 have shown the positive scenario of  
356 decreasing per capita GHG emission (Cambodia, Malaysia, Nepal, Philippines and  
357 Singapore) and the rest, 13 countries along with the world, are showing increasing per capita  
358 GHG emission with time.

359 *Freshwater use:*

360 Among 19 countries, 9 have already crossed per capita freshwater use PB (Afghanistan,  
361 India, Myanmar, Pakistan, Philippines, Sri Lanka, Thailand, Timor-Leste and Vietnam) and 3  
362 are on its way to cross within a few years (Bhutan, Indonesia and Laos). Remaining 7 are  
363 within the safe limits of freshwater use PB. Here, we would like to add that scarcity of data in  
364 the Aquastat database acts as a hindrance to a more comprehensive understanding of  
365 freshwater use, especially for these countries of south and southeast Asia.

366 *Land use:*

367 World average per capita available arable land use is presently within the safe limits of  
368 arable land use PB. However, as the global population continues to increase, both arable land  
369 use PB and global average per capita arable land use decrease. Problem is evident when it is  
370 clear from data that the gap between these two are closing in fast and if this increasing rate of  
371 population growth remains uninterrupted for a few years, World will cross the safe limits of  
372 arable land use PB. Among the 19 countries, though none has crossed the safe limits of arable  
373 land use PB, 5 have come very close to cross the safe limits within a few years (Afghanistan,  
374 Cambodia, Laos, Myanmar and Thailand). Only one country, Sri Lanka, has shown increased  
375 per capita arable land use as opposed to all other remaining 18 countries.

376 *Nitrogen use:*

377 Much before 2002, World had crossed nitrogen use PB and the gap between global  
378 average per capita nitrogen use and safe limits of nitrogen use PB is continuously increasing  
379 over the years. Among the 17 countries, 9 has already crossed nitrogen use PB (Thailand,  
380 Vietnam, Pakistan, India, Indonesia, Afghanistan, Sri Lanka, Malaysia and Bangladesh, in  
381 decreasing order of per capita nitrogen use) and another 4 are close to crossing safe limits of  
382 N use PB (Cambodia, Nepal, Philippines and Bhutan, in decreasing order of per capita  
383 nitrogen use). Remaining 4 countries are well within the safe limits of nitrogen use PB. It is  
384 clear from the data that even the country with the highest value of nitrogen use is almost 50%  
385 less than the global average value. From this, we can infer that, from the perspective of per  
386 capita nitrogen use, these countries of south and southeast Asia are not responsible for such  
387 high global average values of nitrogen use and as a consequence, crossing of the safe limits  
388 of nitrogen use PB.

389 *Phosphorus use:*

390 The world had crossed phosphorus use PB well before 2002 and the gap between safe  
391 limits of phosphorus use PB and global average per capita phosphorus use is continuously  
392 increasing with time. Among the 17 countries, 12 has already crossed phosphorus use PB  
393 (Cambodia, Philippines, Bhutan, Nepal, Sri Lanka, Indonesia, Bangladesh, Thailand, India,  
394 Pakistan, Vietnam and Malaysia, in increasing order of per capita phosphorus use) and 2 are  
395 closing in to cross the phosphorus use PB (Brunei and Maldives). Remaining 3 are well  
396 within the safe limits of phosphorus use PB.

397 *Ecological footprint:*

398 Among 17 countries of south and southeast Asia, 6 have already crossed ecological  
399 footprint PB (Vietnam, Laos, Thailand, Malaysia, Bhutan and Singapore, in increasing order  
400 of per capita ecological footprint) and 7 others are close to crossing the ecological footprint

401 PB (Cambodia, India, Indonesia, Myanmar, Nepal, Philippines and Sri Lanka). Remaining 4  
402 are well within the safe limits of ecological footprint PB.

403 *Material footprint:*

404 Among 17 countries, 5 has already crossed material footprint PB (Bhutan, Thailand,  
405 Maldives, Malaysia and Singapore, in increasing order of per capita material footprint) and  
406 another 6 are about to cross material footprint PB within a few years (India, Cambodia,  
407 Philippines, Laos, Indonesia and Viet Nam, in increasing order of per capita material  
408 footprint). Remaining 6 are well within the safe limits of material footprint PB.

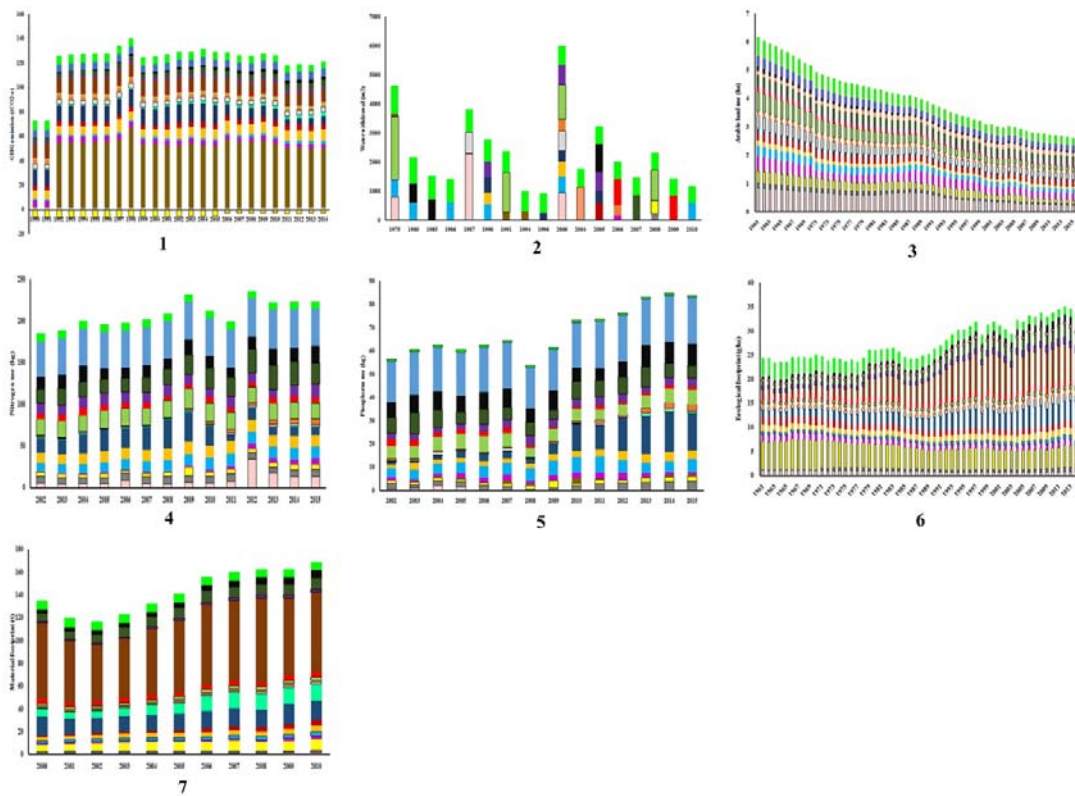

409

410 Fig. 1. Trends in biophysical indicators related to Planetary boundaries for countries of South  
411 and Southeast Asia.

412 Biophysical indicators are - (1) GHG emission, (2) water withdrawal, (3) arable land use, (4)  
413 nitrogen use, (5) phosphorus use, (6) ecological footprint and (7) material footprint.

414 19 countries considered here, are – Afghanistan ( ), Bangladesh ( ), Bhutan ( ), Brunei ( ),  
415 ), Cambodia ( ), India ( ), Indonesia ( ), Lao PDR ( ), Malaysia ( ), Maldives ( ),  
416 Myanmar ( ), Nepal ( ), Pakistan ( ), Philippines ( ), Singapore ( ), Sri Lanka ( ),  
417 Thailand ( ), Timor-Leste ( ) and Vietnam ( ). Global average values ( ) and respective  
418 planetary average per capita boundaries ( ) have also been shown.

419 **b. Social development Indicators:**

420 *Education:*

421 The world reached the desired threshold (10% or less) in ‘children out of the school of  
422 primary school age’ in 2007 and improving since. Among 19 countries, though 5 have not  
423 reached the threshold (Afghanistan, Bhutan, Pakistan, Thailand and Timor-Leste), remaining  
424 all 14 countries have already reached it. In recent few years, for 3 countries (Indonesia,  
425 Thailand and Timor-Leste), the distance from threshold is increased.

426 The world is yet to reach the desired threshold (90% or more) in ‘adult literacy rate’,  
427 however, the condition is improving continuously. Among 19 countries, 9 have already  
428 reached the threshold (Brunei, Indonesia, Malaysia, Maldives, Philippines, Singapore, Sri  
429 Lanka, Thailand and Vietnam) and 4 others are close to reaching it (Bangladesh, Cambodia,  
430 India and Myanmar).

431 The world is yet to reach the desired threshold (90% or more) in ‘secondary school  
432 enrolment rate’, however, the condition is improving with time. Among 18 countries, only 2  
433 have reached the threshold (Brunei and Sri Lanka) and 8 others are closing in (Bhutan, India,  
434 Indonesia, Malaysia, Nepal, Philippines, Thailand and Timor-Leste).

435 *Energy:*

436        Though the condition is improving, World is far from reaching the desired threshold  
437        (90% or more) in ‘access to clean fuels and technologies for cooking’. Among 19 countries,  
438        only 4 have reached the threshold (Brunei, Malaysia, Maldives and Singapore) and 3 others  
439        are close to reaching it (Indonesia, Thailand and Vietnam). However, the remaining 12 are far  
440        away from reaching the threshold.

441        The world is yet to achieve the target threshold (90% or more people) in ‘access to  
442        electricity’. Among 19 countries of south and southeast Asia, 12 have reached the threshold  
443        (Bhutan, Brunei, Indonesia, Malaysia, Maldives, Nepal, Pakistan, Philippines, Singapore, Sri  
444        Lanka, Thailand and Vietnam) and 4 are very close among the remaining (Afghanistan,  
445        Bangladesh, India, and Laos).

446        *Food:*

447        The world has already reached the desired threshold (2700 kcal or more day<sup>-1</sup>) for  
448        ‘average calorific intake of food & drink’ in 1998. Among 17 countries, only 6 have reached  
449        the threshold (Brunei, Indonesia, Malaysia, Maldives, Vietnam and Thailand) and 4  
450        (Myanmar, Nepal, Philippines and Sri Lanka) are very close to reaching it among the  
451        remaining 11.

452        The world has not yet reached the desired threshold (5% or less) for ‘prevalence of  
453        undernourishment’. Among 17 countries, only 2 have reached the threshold (Brunei and  
454        Malaysia) and 4 are very close among the remaining (Indonesia, Maldives, Nepal and  
455        Thailand).

456        *Gender Equality:*

457        The world has reached only half of the desired threshold (50%) for ‘proportion of seats  
458        held by women in national parliaments. Although among the 19 countries, none has reached  
459        threshold, 6 countries have achieved almost equal or better than the global average



460 (Afghanistan, Laos, Nepal, Philippines, Timor-Leste and Vietnam) and 9 are far away from  
461 reaching it in near future (Bhutan, Brunei, India, Indonesia, Malaysia, Maldives, Myanmar,  
462 Sri Lanka and Thailand).

463 *Health:*

464 The world has already reached the desired threshold (70 years or more) for ‘life  
465 expectancy at birth’ in 2008 and continuously improving since. Among 19 countries of south  
466 and southeast Asia, 10 have reached the threshold (Bangladesh, Bhutan, Brunei, Malaysia,  
467 Maldives, Nepal, Singapore, Sri Lanka, Thailand and Vietnam). All the remaining 9 countries  
468 are presently very close and have the potential to reach the threshold within a few years.

469 Though the condition is improving, the world is yet to reach the desired threshold (25 or  
470 less per 1000 live births) in ‘mortality rate of fewer than 5 years’ olds. Among 19 countries,  
471 only 7 have reached the threshold (Brunei, Malaysia, Maldives, Singapore, Sri Lanka,  
472 Thailand and Vietnam). 6 countries among the remaining 12 are very close to reaching the  
473 threshold (Bangladesh, Bhutan, Cambodia, Indonesia, Nepal and Philippines).

474 *Housing:*

475 The world is far for achieving the threshold (10% or less) in ‘population living in slums in  
476 urban areas’ and the condition is not improving at all. Among the 14 countries, none has  
477 reached the threshold but, 7 are close to it (India, Laos, Pakistan, Singapore, Sri Lanka,  
478 Timor-Leste and Vietnam).

479 *Income and Work:*

480 Though the condition is improving, the world is yet to reach the desired threshold (5% or  
481 less) in ‘poverty headcount ratio at \$1.90 a day (2011 PPP)’. Among 15 countries, 5 have

482 reached the threshold (Bhutan, Malaysia, Sri Lanka, Thailand and Vietnam) and 5 of the  
483 remaining are close to it (Indonesia, Maldives, Myanmar, Pakistan and Philippines).

484 The world is yet to reach the desired threshold (6% or less) in ‘youth unemployment, 15-  
485 24y’ and also, the condition is deteriorating globally since 2008. Among 19 countries, only 6  
486 have reached the threshold (Cambodia, Laos, Myanmar, Nepal, Singapore and Thailand) and  
487 3 of the rest are close to it (Pakistan, Philippines and Vietnam).

488 *Networks:*

489 Though the scenario is improving rapidly, the world has just reached only half of the  
490 desired threshold (90% or more) in ‘individuals using the internet’. Among 19 countries, only  
491 a single country, Brunei, has achieved the threshold and 2 are close to it (Malaysia and  
492 Singapore). All others are either near global average or even more distant from the threshold.

493 *Peace and Justice:*

494 Among 19 countries, 3 have yet to reach the threshold (5 or less, up to 2011 and 50 or  
495 less from 2012 onwards) in ‘corruption perceptions index’ and all the remaining 16 have  
496 achieved the threshold. In general, the CPI score is increasing i.e. the level of corruption is  
497 getting higher gradually.

498 The world has reached the desired threshold (10 or less) for ‘intentional homicides (per  
499 100,000 people)’ before 2012. Among 19 countries, all have reached the threshold. However,  
500 the condition is towards a fall for 4 countries with time (Afghanistan, Laos, Pakistan and  
501 Philippines).

502 *Political voice:*

503        Among 19 countries, none have achieved the threshold [more than 0.5 in -2.5 (weak) to  
504        +2.5 (strong) scale] of ‘voice and accountability index’. However, 4 countries are closer to  
505        the threshold than the rest (India, Indonesia, Philippines and Timor-Leste).

506        *Social inequality:*

507        Among 15 countries, none have achieved the threshold [70 on (0–100) scale] of the  
508        Gini index. However, 2 countries are closer to the threshold than the rest (Philippines and  
509        Myanmar).

510        *Water and Sanitation:*

511        Though the global scenario of sanitation is improving, the world is yet to reach the  
512        desired threshold (90% or more) in ‘improved sanitation facilities. Among 18 countries, 5  
513        have reached the threshold (Malaysia, Maldives, Singapore, Sri Lanka and Thailand) and 4  
514        are closing in (Laos, Myanmar, Philippines and Vietnam).

515        The world has already reached the desired threshold (90% or more) of ‘improved water  
516        source’ in 2013 and improving since then. Among 18 countries, 11 have reached the  
517        threshold (Bhutan, India, Malaysia, Maldives, Nepal, Pakistan, Philippines, Singapore, Sri  
518        Lanka, Thailand and Vietnam) and 3 are getting close to it (Bangladesh, Indonesia and  
519        Myanmar).

520

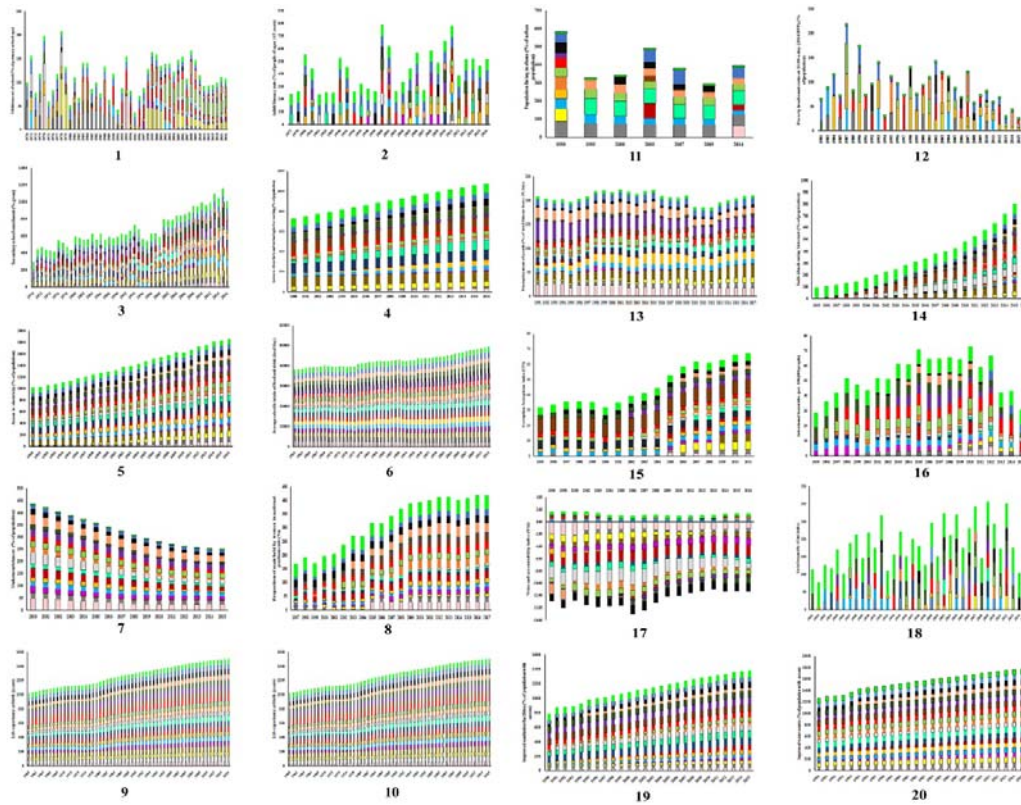

521

522 Fig. 2. Trends in social development indicators related to safe and Just space (SJS) of  
523 Doughnut economy for countries of South and Southeast Asia.

524 Indicators of social development are – (1) children out of school of primary school age, (2)  
525 adult literacy rate, (3) secondary school enrolment, (4) access to electricity, (5) access to  
526 clean fuels and technologies for cooking, (6) average calorific intake of food and drink, (7)  
527 undernourishment, (8) proportion of seats held by women in national parliaments, (9) life  
528 expectancy at birth, (10) mortality rate under 5 years, (11) urban population living in slums,  
529 (12) poverty headcount ratio at \$1.90 a day, (13) youth unemployment, (14) individuals using  
530 the internet, (15) corruption perceptions index, (16) intentional homicides, (17) voice and  
531 accountability index, (18) Gini index, (19) improved sanitation facilities and (20) improved  
532 water source. Twelve dimensions of the social foundation are education 1-3, energy 4-5, food  
533 6-7, gender equality 8, health 9-10, housing 11, income and work 12-13, networks 14, peace  
534 and justice 15-16, political voice 17, social equity 18, water and sanitation 19-20.

535 19 countries considered here, are – Afghanistan ( ), Bangladesh ( ), Bhutan ( ), Brunei ( )  
 536 ), Cambodia ( ), India ( ), Indonesia ( ), Lao PDR ( ), Malaysia ( ), Maldives ( ),  
 537 Myanmar ( ), Nepal ( ), Pakistan ( ), Philippines ( ), Singapore ( ), Sri Lanka ( ),  
 538 Thailand ( ), Timor-Leste ( ) and Vietnam ( ). Global average values ( ) and respective  
 539 United Nations sustainable development goal values ( ) have also been shown.

540 The cumulative scenario of 27 indicators related to safe and just operating space for the  
 541 countries of south and southeast Asia of the present time (as per latest available data) in  
 542 contrast with the past (the 2000s) are represented in Table 3. All of the biophysical resource  
 543 consumption indicators are deteriorating. Among the 12 domains of social development, only  
 544 2 have remained either unchanged (political voice) or declining (social equity). In all of the  
 545 remaining 10 domains, the overall scenario for these countries showing positive changes.  
 546 This means development is taking place at the cost of overconsumption of the biophysical  
 547 resources. Ranking of countries based on this SJS score is given in Supplementary Table 1.

| No | Indicator       | Year   | Scenario | No | Indicator      | Year   | Scenario |
|----|-----------------|--------|----------|----|----------------|--------|----------|
| 1  | Climate change  | 2000   |          | 2  | Freshwater use | 2000   |          |
|    |                 | Recent |          |    |                | Recent |          |
| 3  | Arable land use | 2000   |          | 4  | Nitrogen use   | 2002   |          |

|    |                     |        |  |    |                                                |        |  |
|----|---------------------|--------|--|----|------------------------------------------------|--------|--|
|    |                     | Recent |  |    |                                                | Recent |  |
| 5  | Phosphorus use      | 2002   |  | 6  | Ecological footprint                           | 2000   |  |
|    |                     | Recent |  |    |                                                | Recent |  |
| 7  | Material footprint  | 2000   |  | 8  | Children out of school (of primary school age) | 2000   |  |
|    |                     | Recent |  |    |                                                | Recent |  |
| 9  | Adult literacy rate | 2000   |  | 10 | Secondary School enrolment                     | 2000   |  |
|    |                     | Recent |  |    |                                                | Recent |  |
| 11 | Electricity         | 2000   |  | 12 | Clean fuels and technologies                   | 2000   |  |
|    |                     | Recent |  |    |                                                | Recent |  |

|    |                 |        |  |    |                              |        |  |
|----|-----------------|--------|--|----|------------------------------|--------|--|
| 13 | Caloric intake  | 2000   |  | 14 | Undernourishment             | 2000   |  |
|    |                 | Recent |  |    |                              | Recent |  |
| 15 | Gender Equality | 2000   |  | 16 | Life expectancy              | 2000   |  |
|    |                 | Recent |  |    |                              | Recent |  |
| 17 | Mortality rate  | 2000   |  | 18 | Urban slum living population | 2000   |  |
|    |                 | Recent |  |    |                              | Recent |  |
| 19 | Poverty         | 2000   |  | 20 | Youth Unemployment           | 2000   |  |
|    |                 | Recent |  |    |                              | Recent |  |
| 21 | Internet use    | 2000   |  | 22 | Corruption perceptions       | 2000   |  |

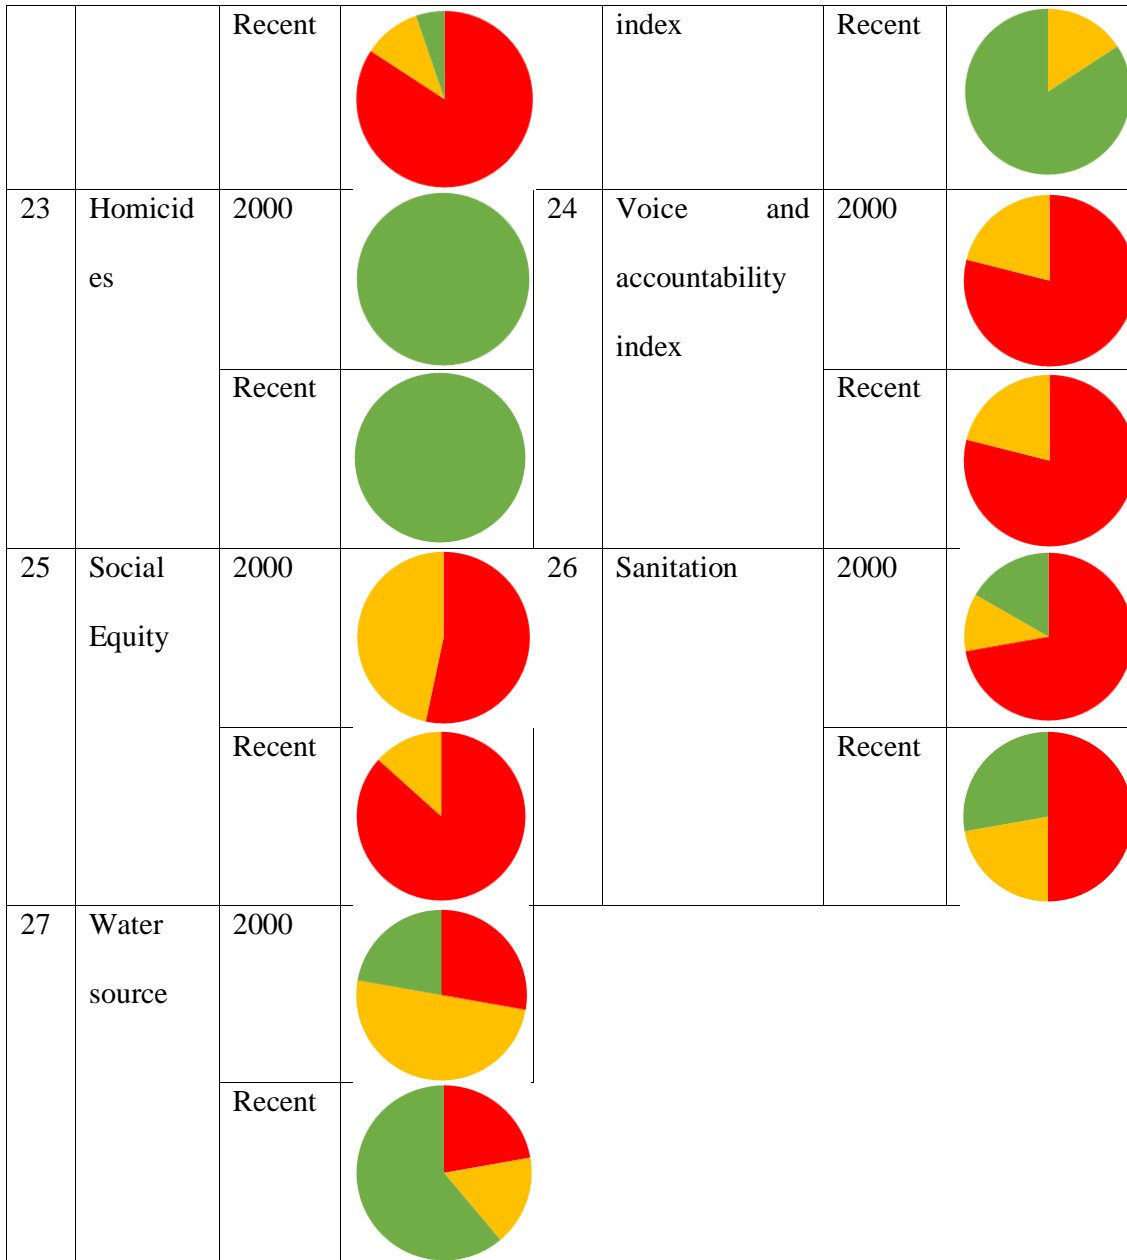

548

549 Table 3: Trends of indicators related to safe and just operating space (SJS) for countries of  
 550 south and southeast Asia.

551 For biophysical indicators (1-7), green indicates the proportion of countries within the safe  
 552 limits of PB, red indicates the proportion of countries that have crossed biophysical  
 553 boundaries and yellow indicates the proportion of countries that are close to crossing the  
 554 biophysical boundaries. For social development indicators (8-27), green indicates the



555 proportion of countries who have achieved the sustainable development goals set by United  
556 Nations, yellow indicates the proportion of countries close to reaching the targets and red  
557 indicates the proportion of countries far distant from the desired goals.

558 We get a safe and just space location graph (safe in the x-axis and just in y-axis) for countries  
559 of south and southeast Asia in Fig. 3. From this graph, it can be clearly understood that – (1)  
560 Only 2 countries are in a stage where, a higher degree of social development has been  
561 achieved at a cost of depleted biophysical resources, namely Malaysia and Thailand. (2) The  
562 only single country is in the zone of safe and just space is the Maldives. (3) Other 3 countries  
563 have shown desired progress by entering the zone of safe and just space, viz. Brunei, Sri  
564 Lanka and Vietnam. (4) However, most of the countries are in a zone of safe space i.e. they  
565 have not crossed most of the respective biophysical boundaries, but, also not significant  
566 progress has been achieved in social development. To sum up, most of the countries of south  
567 and southeast Asia belong to the zone of safe but not just operating space, neither in past (the  
568 2000s) nor in present (as per most recently available data).

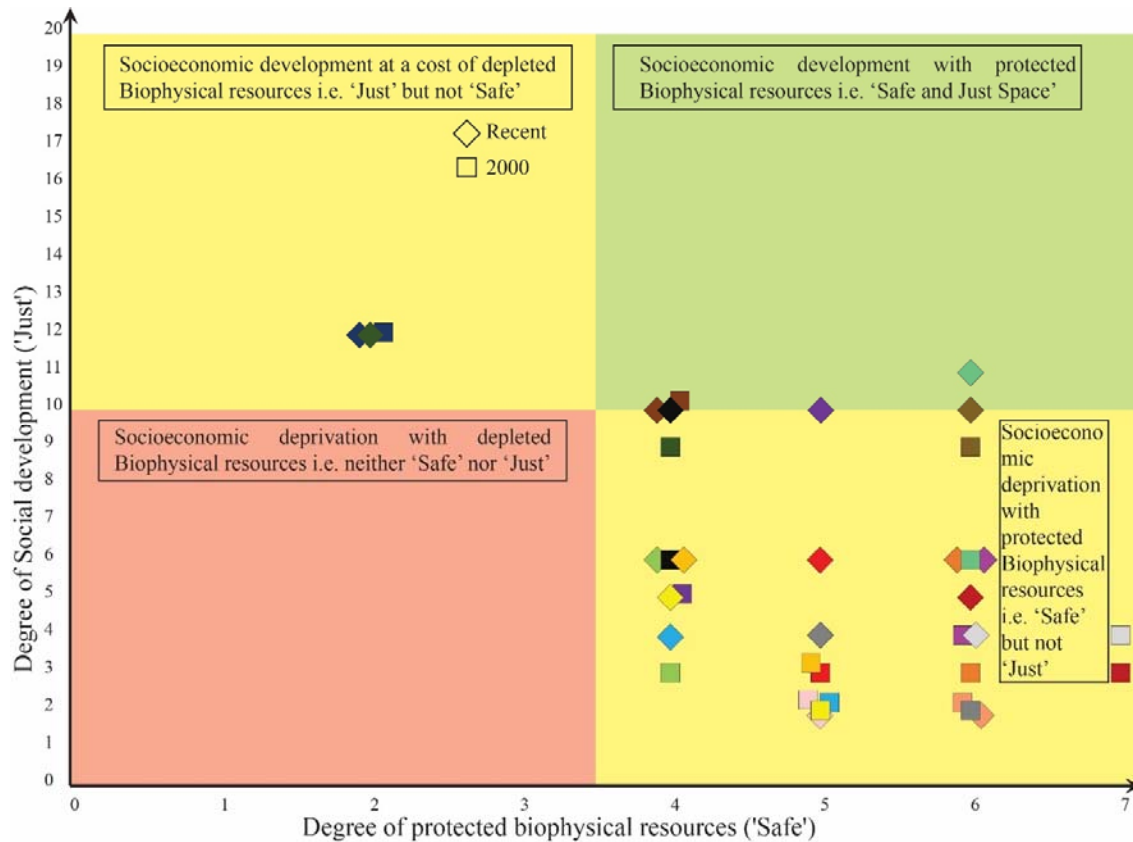

569

570 Fig. 3. Presence of countries (N=19) of south and southeast Asia in past (2000, shown as  
 571 rhombus) and present (as per recent available data, shown as square) on number of social  
 572 development thresholds achieved ('just' space, 20 indicators) versus number of biophysical  
 573 boundaries not crossed ('safe' space, 7 indicators). The location has been divided into 4 zones  
 574 – I. neither safe or just zone (lower left), II. safe but not just zone (lower right), III. just but  
 575 not safe zone (upper left) and IV. Safe and just zone (upper right).

576 19 countries considered here, are – Afghanistan ( ), Bangladesh ( ), Bhutan ( ), Brunei ( ),  
 577 ), Cambodia ( ), India ( ), Indonesia ( ), Lao PDR ( ), Malaysia ( ), Maldives ( ),  
 578 Myanmar ( ), Nepal ( ), Pakistan ( ), Philippines ( ), Singapore ( ), Sri Lanka ( ),  
 579 Thailand ( ), Timor-Leste ( ) and Vietnam ( ).

580 **Discussion:**

581 There have been a lot of interdisciplinary studies for the last few years allied to SJS  
582 framework. DE framework for both Welsh and UK has been analyzed by Sayers and Trebeck  
583 (2015) and Sayers (2015). Chapron et al. (2017) advocated towards enforcement of  
584 environmental laws in form of tools to check anthropogenic impacts on the environment  
585 through playing under safe limits of planetary boundaries. The ‘biosphere integrity’ has  
586 created a lot of debate surrounding a suitable indicator for quantification (Samper, 2009;  
587 Running, 2012; Mace et al., 2014; Newbold et al., 2016). Likewise, for ‘freshwater use’  
588 (Rockström and Karlberg, 2010; Bogardi et al., 2013; Gerten et al., 2013; Heistermann, 2017,  
589 Gleick, 2018) ‘introduction of novel entities’ (Sala and Goralczyk, 2013; Persson et al., 2013;  
590 Diamond et al., 2015; Villarrubia-Gómez et al., 2017) with their respective safe boundaries.  
591 There has also been some work to connect the planetary boundary with governance, along  
592 with policy implications (Bierman, 2012, Galaz et al., 2012a, 2012b; Reischl, 2012). A  
593 significant amount of work has also been done on establishing and applying PB framework at  
594 regional-scale (Dearing et al., 2014; Häyhä et al., 2016; Cole et al., 2017; McLaughlin, 2018).  
595 Some studies have been done to explore the connection of food system and nutrients with PB  
596 framework (Kahiluoto et al., 2014, 2015; Campbell et al., 2017; Conijn et al., 2018). A  
597 preliminary framework to apply the PB framework in the marine context has been done by  
598 Nash et al. (2017). Simultaneously, there have been criticisms of SJS framework (Montoya et  
599 al., 2018a, 2018b). Recently, Steffen et al. (2018) have proposed the scenario of ‘Hothouse  
600 Earth’ as a consequence of unchecked biophysical consumption if humanity continues to  
601 cross the safe limits of planetary boundaries and maintain that trajectory.

602 Two studies have incorporated sustainability of these countries of south and southeast Asia  
603 based on PB and SJS framework, Nykvist et al. (2013) and O’Neill et al (2018). Nykvist et al.  
604 (2013) have considered four planetary boundaries in their report, (1) climate change ( $\text{tCO}_2$   
605 per capita  $\text{y}^{-1}$ ), (2) nitrogen use ( $\text{kg N per capita y}^{-1}$ ), (3) freshwater use ( $\text{m}^3$  per capita  $\text{y}^{-1}$ ) and

606 (4) land use (ha per capita). According to them, most of these countries did not cross per  
607 capita PB. One deficit in the first study is that it did not include correlated social dimensions  
608 (i.e. ‘just space’ framework or any other). O’Neill et al. (2018) used seven and eleven  
609 indicators for ‘safe’ and ‘just’ space analysis, respectively. According to them, although these  
610 countries have trans relatively fewer biophysical boundaries, they have also failed to achieve  
611 very few social thresholds in comparison with other developed countries of the world.

612 The principal aim of this study was to evaluate the sustainable development, inclusively,  
613 using SJS framework at the national level for countries of south and south-east Asia. We have  
614 tried to maintain the original concept and design of the two frameworks as much as possible  
615 while deriving results that are meaningful in national-scale for countries of south and south-  
616 east Asia.

617 There are some recommendations that we came up during this study: (1) There is an  
618 increasing necessity to establish and maintain the publicly available sub-national level  
619 database. (2) Data coverage period should be as long as possible. This might prove to be a  
620 good opportunity for data-poor countries to commence a competent accumulation of  
621 inclusive key data for addressing their national-to-global challenges. (3) Fitting indicator for  
622 analysing the progress for the original Steffen’s (2015) and Raworth’s (2017) framework  
623 should be cultivated. (4) Additional work is needed for an approach to recognize  
624 policymaking and implementation gaps of each nation for all of the indicators in the SJS  
625 framework. (5) The biophysical resource consumption (‘safe’ part) is not at yet most  
626 endangered for these countries. But social development (‘just’ part) should be need of the  
627 hour for these countries, which remaining under safe limits of biophysical resources. (6) We  
628 recommend that every nation (like – countries of south and southeast Asia) should act more  
629 preemptively and embrace policies in accordance with the recommendations of international  
630 authoritative organizations, like - UN, UNFCCC, UNDP, UNEP etc. (7) It is desirable that SJS

631 framework is accompanied with systems dynamic analysis of the interactions between each  
632 of the biophysical and social conditions. (8) Few dimensions related to PB framework that do  
633 not yet have any unanimously accepted indicators along with corresponding boundaries that  
634 fit national or sub-national scales, such as – change in biosphere integrity, stratospheric ozone  
635 depletion, ocean acidification, atmospheric aerosol loading and the introduction of novel  
636 entities. It is necessary. (9) Mere identification and measurement of indicators for the PB  
637 framework is not enough, even fail its purpose, if not proper checkpoints are made for these  
638 and implemented in policy. (10) Planning the future for nations under safe operating limits of  
639 biophysical resource consumptions and equitably provisioning social development should be  
640 the primacy in upcoming decades.

641 There are few novelties of this work: First, it aims to convey a pictorial portrayal of the  
642 dynamic state of socio-ecological indicators related to national-scale priorities and scenarios  
643 in the south and southeast Asia. Second, this work intersects a multidimensional set of  
644 indicators in a simple way, distinguishes the slit in the knowledge-base, and promotes new  
645 understandings to eliminate social deprivation whilst remaining under safe consumption  
646 limits of biophysical resources. Third, it provides south and southeast Asia's (nation-scale)  
647 proximity to respective environmental boundaries and its satisfactory level of social well-  
648 being. Fourth, the sustainable development goals are “action-oriented, concise and easy to  
649 communicate, limited in number, aspirational, global in nature and universally applicable to  
650 all countries, while taking into account different national realities, capacities and levels of  
651 development and respecting national policies and priorities” (Rio+20 outcome document,  
652 2012). Sixteen of the original seventeen SDG criteria have been connected in this framework.  
653 Thus, this work maintains a balance between simple and comprehensive approach, so that  
654 progress of all the SDGs in countries of south and southeast Asia can be comprehended (at  
655 least through 1 indicator/1 goal of UN SDG).

656

657

658 **Acknowledgement:**

659 We would like to thank Sk. Rohan Tanvir, The Institution of Engineers (India) for his  
660 assistance during the preparation of diagrams.

661 **Funding:** This research did not receive any specific grant from funding agencies in the  
662 public, commercial, or not-for-profit sectors.

663

664

665

666

667

668

669

670

671

672

673

674

675

676

677

678

679

680

681

682

683 **References**

684 Biermann, F., 2012. Planetary boundaries and earth system governance: exploring the links.

685 *Ecol. Econ.* 81, 4–9. doi: 10.1016/j.ecolecon.2012.02.016.

686

687 Bogardi, J. J., Fekete, B., M., Vorosmarty, C. J., 2013. Planetary boundaries revisited: a view

688 through the 'water lens'. *Curr. Opin. Environ. Sustain.* 5 (6), 581–589. doi:

689 10.1016/j.cosust.2013.10.006.

690

691 Borucke, M., Moore, D., Cranston, G., Gracey, K., Iha, K., Larson, J., Lazarus, E., Morales,

692 J. C., Wackernagel, M., Galli, A., 2013. Accounting for demand and supply of the

693 biosphere's regenerative capacity: The National Footprint Accounts' underlying methodology

694 and framework. *Ecol. Indic.* 24, 518–533. doi: 10.1016/j.ecolind.2012.08.005.

695

696 CAIT, 2018. World Resource Institute. (<http://cait.wri.org/>) (accessed 17.04.2018).

697

698 Campbell, B. M., Beare, D. J., Bennett, E. M., Hall-Spencer, J. M., Ingram, J. S. I., Jaramillo,

699 F., Ortiz, R., Ramankutty, N., Sayer, J. A., Shindell, D., 2017. Agriculture production as a

700 major driver of the Earth system exceeding planetary boundaries. *Ecol. Soc.* 22 (4), 8. doi:

701 10.5751/ES-09595-220408.

702

703 Carpenter, S.R., Bennett, E.M., 2011. Reconsideration of the planetary boundary for

704 phosphorus. *Environ. Res. Lett.* 6, 014009, doi:10.1088/1748-9326/6/1/014009.

705

706 Chapron, G., Epstein, Y., Trouwborst, A., López-Bao, J. V., 2017. Bolster legal boundaries to  
707 stay within planetary boundaries. *Nat. Ecol. Evol.* 1, 0086. doi: 10.1038/s41559-017-0086.

708

709 Cole, M. J., Bailey, R. M., New, M. G., 2017. Spatial variability in sustainable development  
710 trajectories in South Africa: provincial level safe and just operating spaces. *Sust. Sci.* 12 (5),  
711 829-848. doi: 10.1007/s11625-016-0418-9.

712

713 Cole, M. J., Bailey, R. M., New, M. G., 2014. Tracking sustainable development with a  
714 national barometer for South Africa using a downscaled “safe and just space” framework.  
715 *Proc. Natl. Acad. Sci. USA* 111, E4399–E4408. doi: 10.1073/pnas.1400985111.

716 Conijn, J. G., Bindraban, P. S., Schröder, J. J., Jongschaap, R. E. E., 2018. Can our global  
717 food system meet food demand within planetary boundaries? *Agric. Ecosyst. Environ.* 251,  
718 244–256. doi: 10.1016/j.agee.2017.06.001.

719

720 Dao, H., Peduzzi, P., Chatenoux, B., Bono, A. D., Schwarzer, S., Friot, D., 2015.  
721 Environmental Limits and Swiss Footprints Based on Planetary Boundaries. (UNEP/GRID-  
722 Geneva and University of Geneva, Geneva).

723

724 Dao, H., Peduzzi, P., Friot, D., 2018. National environmental limits and footprints based on  
725 the Planetary Boundaries framework: The case of Switzerland. *Glob. Environ. Chang.* 52, 49-  
726 57. doi: 10.1016/j.gloenvcha.2018.06.005.

727

728 Dearing, J.A., Wang, R., Zhang, K., Dyke, J. G., Haberl, H., Hossain, S., Langdon, P. G.,  
729 Lenton, T. M., Raworth, K., Brown, S., Carstensen, J., Cole, M. J., Cornell, S. E., Dawson, T.



730 P., Doncaster, C. P., Eigenbrod, F., Florrke, M., Jeffers, E., Mackay, A. W., Nykvist, B.,  
731 Poppy, G. M., 2014. Safe and just operating spaces for regional social-ecological system.  
732 *Glob. Environ. Chang.* 28:227–238. doi: 10.1016/j.gloenvcha.2014.06.012.  
733  
734 Diamond, M. L., deWit, C. A., Molander, S., Scheringer, M., Backhaus, T., Lohmann, R.,  
735 Rickard Arvidsson, R., Bergman, Å, Hauschild, M., Holoubek, I., Persson, L., Suzuki, N.,  
736 Vighi, M., Zetzsch, C., 2015. Exploring the planetary boundary for chemical pollution.  
737 *Environ. Int.* 78, 8–15. doi: 10.1016/j.envint.2015.02.001.  
738  
739 Dittrich, M., Giljum, S., Lutter, S., Polzin, C., 2012. Green Economies Around the World?  
740 Implications of Resource Use for Development and the Environment. (Sustainable Europe  
741 Research Institute, Vienna).  
742  
743 Food and Agriculture Organization, 2018. Aquastat online database.  
744 (<http://www.fao.org/nr/water/aquastat/main/index.stm>) (accessed 17.04.2018)  
745  
746 Food and Agriculture Organization, 2018. FAO Statistical Database. (<http://faostat.fao.org/>)  
747 (accessed 17.04.2018).  
748 Galaz, V., Biermann, F., Crona, B., Folke, C., et al., 2012a. ‘Planetary boundaries’—  
749 exploring the challenges for earth system governance. *Curr. Opin. Environ. Sustain.* 4, 80–  
750 87. doi: 10.1016/j.cosust.2012.01.006.  
751  
752 Galaz, V., Crona, B., Österblom, H., Olsson, P., Folke, C., 2012b. Polycentric systems and  
753 interacting planetary boundaries — Emerging governance of climate change–ocean

754 acidification— marine biodiversity. *Ecol. Econ.* 81, 21–32. doi:  
755 10.1016/j.ecolecon.2011.11.012.

756

757 Gerten, D., Hoff, H., Rockström, J., Jägermeyr, J., Kummu, M., Pastor, A.V., 2013. Towards  
758 a revised planetary boundary for consumptive freshwater use: role of environmental flow  
759 requirements. *Curr. Opin. Environ. Sustain.* 5, 551–558. doi: 10.1016/j.cosust.2013.11.001.

760

761 Gleick, P. H., 2018. Transitions to freshwater sustainability. *Proc Natl Acad Sci USA*, doi:  
762 10.1073/pnas.1808893115.

763

764 Global Footprint Network, 2018. National Footprint Accounts (GFN, Oakland, California).  
765 (accessed 17.04.2018).

766

767 Häyhä, T., Cornell, S. E., Hoff, H., Lucas, P. L., van Vuuren, D. P., 2018. Operationalizing  
768 the concept of a safe operating space at the EU level – first steps and explorations. Stockholm  
769 Resilience Centre Technical Report, prepared in collaboration with Stockholm Environment  
770 Institute (SEI) and PBL Netherlands Environmental Assessment Agency. Stockholm  
771 Resilience Centre, Stockholm University, Sweden.

772

773 Häyhä, T., Lucas, P. L., van Vuuren, D. P., Cornell, S. E., Hoff, H., 2016. From planetary  
774 boundaries to national fair shares of the global safe operating space— How can the scales be  
775 bridged? *Glob. Environ. Change* 40, 60–72. doi: 10.1016/j.gloenvcha.2016.06.008.

776

777 Heistermann, M., 2017. HESS Opinions: A planetary boundary on freshwater use is  
778 misleading. *Hydrol. Earth Syst. Sci.* 21, 3455–3461. doi:10.5194/hess-21-3455-2017.

779

780 Hoff, H., Nykvist, B., Carson, M., 2014. “Living well, within the limits of our planet”?

781 Measuring Europe's growing external footprint. (Stockholm Environment Institute, Sweden)

782 Kahiluoto, H., Kuisma, M., Kuokkanen, A., Mikkila, M., Linnanen, L. 2014. Taking

783 planetary nutrient boundaries seriously: Can we feed the people? *Glob Food Sec.* 3, 16–21.

784 doi: 10.1016/j.gfs.2013.11.002.

785

786 Kahiluoto, H., Kuisma, M., Kuokkanen, A., Mikkila, M., Linnanen, L. 2015. Local and social

787 facets of planetary boundaries: right to nutrients. *Environ. Res. Lett.* 10, 104013. doi:

788 10.1088/1748-9326/10/10/104013.

789

790 Mace, G. M., Reyers, B., Alkemade, R., Oonsie, R., Stuart, F., Cornell, S. E., Diaz, S.,

791 Jennings, S., Leadley, P., Mumby, P., Purvis, A., Scholes, R. J., Seddon, A. W. R., Solan, M.,

792 Steffen, W., Woodward, G., 2014. Approaches to defining a planetary boundary for

793 biodiversity. *Glob. Environ. Change* 28, 289–297. doi: 10.1016/j.gloenvcha.2014.07.009.

794

795 McLaughlin, J. F., 2018. Safe operating space for humanity at a regional scale. *Ecol. Soc.*

796 23(2), 43. doi: 10.5751/ES-10171-230243.

797

798 Montoya, J. M., Donohue, I., Pimm, S. L., 2018a. Planetary Boundaries for Biodiversity:

799 Implausible Science, Pernicious Policies. *Trends. Ecol. Evol.* 33 (2), 71-93. doi:

800 10.1016/j.tree.2017.10.004.

801

802 Montoya, J. M., Donohue, I., Pimm, S. L., 2018b. Why a Planetary Boundary, If It Is Not  
803 Planetary, and the Boundary Is Undefined? A Reply to Rockström et al. *Trends. Ecol. Evol.*  
804 33 (4), 234. doi: 10.1016/j.tree.2018.01.008.

805

806 Nash, K. L., Cvitanovic, C., Fulton, E. A., Halpern, B. S., Milner-Gulland, E. J., Watson, R.  
807 A., Blanchard, J. L., 2017. Planetary boundaries for a blue planet. *Nat. Ecol. Evol.* 1(11),  
808 1625-1634. doi: 10.1038/s41559-017-0319-z.

809

810 Newbold, T., Hudson, L. N., Arnell, A. P., Contu, S., Palma, A. D., Ferrier, S., Hill, S. L. L.,  
811 Hoskins, A. J., Lysenko, I., Phillips, H. R. P., Burton, V. J., Chng, C. W. T., Emerson, S.,  
812 Gao, D., Pask-Hale, G., Hutton, J., Jung, M., Sanchez-Ortiz, K., Simmons, B. I., Whitmee, S.,  
813 Zhang, H., Scharlemann, J. P. W., Purvis, A., 2016. Has land use pushed terrestrial  
814 biodiversity beyond the planetary boundary? A global assessment. *Science* 353 (6296), 288-  
815 291. doi: 10.1126/science.aaf2201.

816 Nykvist, B., Persson, A., Moberg, F., Persson, L., Cornell, S., Rockström, J., 2013. National  
817 Environmental Performance on Planetary Boundaries. (Swedish Environmental Protection  
818 Agency Report 6576, Stockholm).

819

820 O'Neill, D. W., Fanning, A. L., Lamb, W. F., Steinberger, J. K., 2018. A good life for all  
821 within planetary boundaries. *Nat. Sust.* 1, 88–95. doi: 10.1038/s41893-018-0021-4.

822

823 Persson, L. M., Breitholtz, M., Cousins, I. T., de Wit, C. A., MacLeod, M., McLachlan, M.S.,  
824 2013. Confronting unknown planetary boundary threats from chemical pollution. *Environ.*  
825 *Sci. Technol.* 47, 12619–12622. doi: 10.1021/es402501c.

826

827 Raworth, K., 2012. A Safe and Just Space for Humanity: Can We Live Within the Doughnut?  
828 Oxfam Discussion Paper. Oxfam, Oxford, UK.

829

830 Raworth, K., 2017a. A Doughnut for the Anthropocene: humanity's compass in the 21st  
831 century. *Lancet Planet. Health*. 1 (2), e48–e49. doi: 10.1016/S2542-5196(17)30028-1.

832

833 Raworth, K., 2017b. Doughnut Economics: Seven Ways to Think Like a 21st-Century  
834 Economist (Random House, London).

835

836 Reischl, G., 2012. Designing institutions for governing planetary boundaries—lessons from  
837 global forest governance. *Ecol Econ*. 81, 33–40.

838

839 Rockström, J., Karlberg, L., 2010. The quadruple squeeze: defining the safe operating space  
840 for freshwater use to achieve a triply green revolution in the Anthropocene. *AMBIO A J.*  
841 *Hum. Environ.* 39, 257–265. doi: 10.1007/s13280-010-0033-4.

842

843 Rockström, J., Steffen, W., Noone, K., Persson, A., Chapin, F.S., Lambin, E., Lenton, T.M.,  
844 Scheffer, M., Folke, C., Schellnhuber, H.J., Nykvist, B., de Wit, C.A., Hughes, T., van der  
845 Leeuw, S., Rodhe, H., Sorlin, S., Snyder, P.K., Costanza, R., Svedin, U., Falkenmark, M.,  
846 Karlberg, L., Corell, R.W., Fabry, V.J., Hansen, J., Walker, B., Liverman, D., Richardson, K.,  
847 Crutzen, P., Foley, J., 2009a. A safe operating space for humanity. *Nature*, 461, 472–475. doi:  
848 10.1038/461472a.

849

850 Rockström, J., Steffen, W., Noone, K., Persson, Å., Chapin, F.S., Lambin, E., Lenton, T.M.,  
851 Scheffer, M., Folke, C., Schellnhuber, H.J., Nykvist, B., de Wit, C.A., Hughes, T., van der

- 852 Leeuw, S., Rodhe, H., Sörlin, S., Snyder, P.K., Costanza, R., Svedin, U., Falkenmark, M.,  
853 Karlberg, L., Corell, R.W., Fabry, V.J., Hansen, J., Walker, B., Liverman, D., Richardson, K.,  
854 Crutzen, P., Foley, J., 2009b. Planetary boundaries: Exploring the safe operating space for  
855 humanity. *Ecol. Soc.* 14 (2), 32. doi: 10.5751/ES-03180-140232.
- 856
- 857 Running, S. W., 2012. A Measurable Planetary Boundary for the Biosphere. *Science* 337  
858 (6101), 1458-1459. doi: 10.1126/science.1227620.
- 859
- 860 Sachs, D. J., 2012. From millennium development goals to sustainable development goals.  
861 *Lancet*, 379, 2206-2211. doi: 10.1016/S0140-6736(12)60685-0.
- 862
- 863 Sala, S., Goralczyk, M., 2013. Chemical footprint: a methodological framework for bridging  
864 life cycle assessment and planetary boundaries for chemical pollution. *Integr. Environ.*  
865 *Assess. Manag.* 9, 623–632. doi: 10.1002/ieam.1471.
- 866
- 867 Samper, C., 2009. Planetary boundaries: rethinking biodiversity. *Nat. Rep. Clim. Change*,  
868 3,118–119. doi:10.1038/climate.2009.99.
- 869
- 870 Sayers, M., 2015. The Welsh Doughnut: A framework for environmental sustainability and  
871 social justice. Oxfam, Oxford, UK.
- 872
- 873 Sayers, M., Trebeck, K., 2015. The UK Doughnut: A framework for environmental  
874 sustainability and social justice. Oxfam, Oxford, UK.
- 875
- 876 Smil, V., 2000. *Energies: An Illustrated Guide to the Biosphere and Civilization* (MIT Press).

877

878 Steffen, W., Crutzen, P.J., McNeill, J.R., 2007. The Anthropocene: Are Humans Now  
879 Overwhelming the Great Forces of Nature. *AMBIO A J. Hum. Environ.* 36 (8), 614-621. doi:  
880 10.1579/0044-7447(2007)36[614:TAAHNO]2.0.CO;2.

881

882 Steffen, W., Persson, Å., Deutsch, L., Zalasiewicz, J., Williams, M., Richardson, K.,  
883 Crumley, C., Crutzen, P., Folke, C., Gordon, L., Molina, M., Ramanathan, V., Rockström, J.,  
884 Scheffer, M., Schellnhuber, H.J., Svedin, U., 2011. The anthropocene: From global change to  
885 planetary stewardship, *AMBIO A J. Hum. Environ.* 40 (7), 739-761. doi: 10.1007/s13280-  
886 011-0185-x.

887

888 Steffen, W., Richardson, K., Rockström, J., Cornell, S.E., Fetzer, I., Bennett, E.M., Biggs, R.,  
889 Carpenter, S.R., de Vries, W., de Wit, C.A., Folke, C., Gerten, D., Heinke, J., Mace, G.M.,  
890 Persson, L.M., Ramanathan, V., Reyers, B., Sörlin, S., 2015. Planetary boundaries: guiding  
891 human development on a changing planet. *Science* 80:347. doi:10.1126/science.1259855  
892 1259855.

893

894 Steffen, W., Rockström, J., Richardson, K., Lenton, T.M., Folke, C., Liverman, D.,  
895 Summerhayes, C.P., Barnosky, A.D., Cornell, S.E., Crucifix, M., Donges, J.F., Fetzer, I.,  
896 Lade, S.J., Scheffer, M., Winkelmann, R., Schellnhuber, H.J., 2018. Trajectories of the Earth  
897 System in the Anthropocene. *Proc. Natl. Acad. Sci. USA* 115 (33) 8252-8259. doi:  
898 10.1073/pnas.1810141115.

899

900 Transparency International, 2018. Corruption perceptions index 2017  
901 (<https://www.transparency.org/>). (accessed 17.04.2018).

902

903 United Nations Development Programme, 2015. Human Development Report 2015, New  
904 York.

905

906 United Nations Environment Programme, 2017. The Emissions Gap Report (UNEP, Nairobi).

907

908 United Nations, 2012. The future we want – outcome document (A/RES/66/288).

909

910 United Nations, 2015. Transforming Our World: The 2030 Agenda for Sustainable  
911 Development (United Nations, 2015).

912

913 UNU-WIDER, ‘World Income Inequality Database (WIID3.4) (accessed 17.04.2018).

914

915 Villarrubia-Gómez, P., Cornell, S. E., Fabres, J., 2017. Marine plastic pollution as a planetary  
916 boundary threat – The drifting piece in the sustainability puzzle. *Mar. Policy* doi:  
917 10.1016/j.marpol.2017.11.035.

918

919 Wiedmann, T. O., Schandl, H., Lenzen, M., Moran, D., Suh, S., West, J., Kanemoto, K.,  
920 2015. The material footprint of nations. *Proc Natl Acad Sci USA* 112, 6271-6276,  
921 doi:10.1073/pnas.1220362110.

922

923 World Bank *World Development Indicators* (World Bank, 2018); <http://data.worldbank.org/>  
924 (accessed 17.04.2018).

925



926 World Bank, 2018. Tracking SDG 7: The Energy Progress Report 2018 (World Bank,  
927 Washington DC).

928

929 World Commission on Environment and Development, 1987. Our Common Future. Oxford  
930 University Press, New York.

931

932 World Governance Indicators, 2017. World Bank, 2017 update.  
933 ([info.worldbank.org/governance/wgi/#home](http://info.worldbank.org/governance/wgi/#home)) (accessed 17.04.2018).

934

935 World Health Organization, 2015. World Health Statistics. (WHO, Geneva).

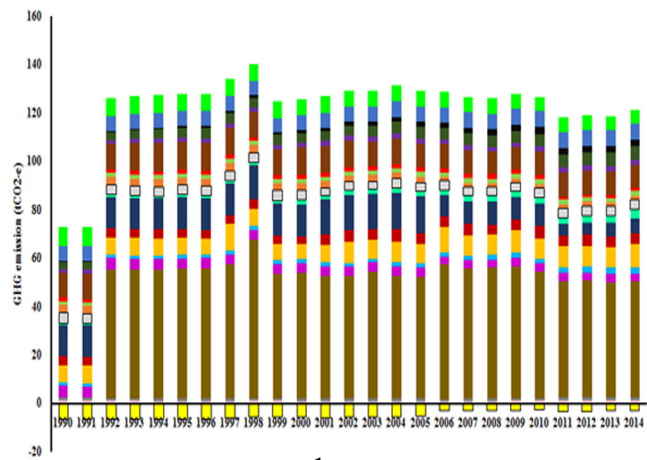

1

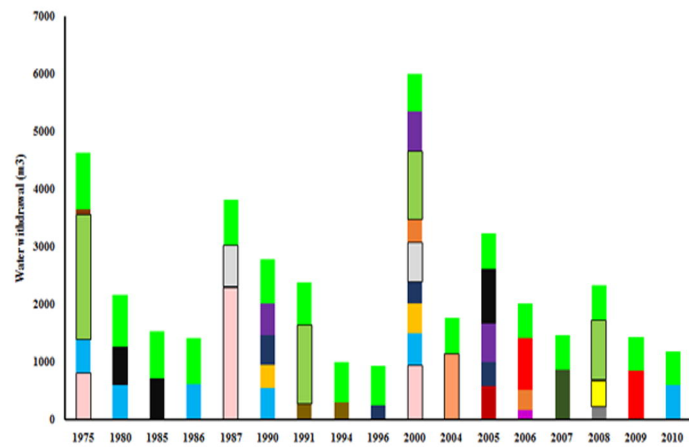

2

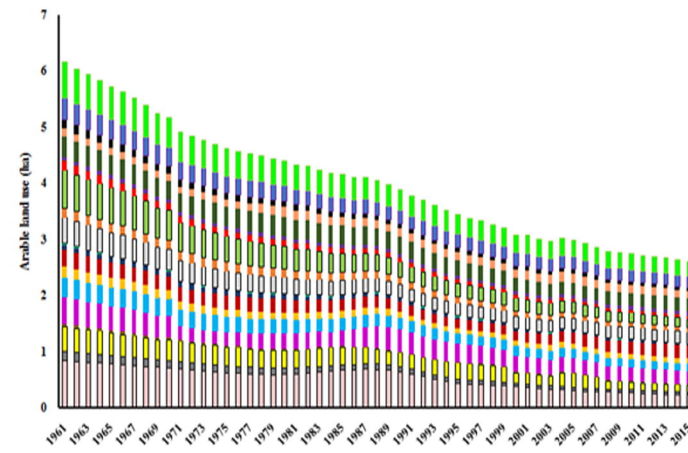

3

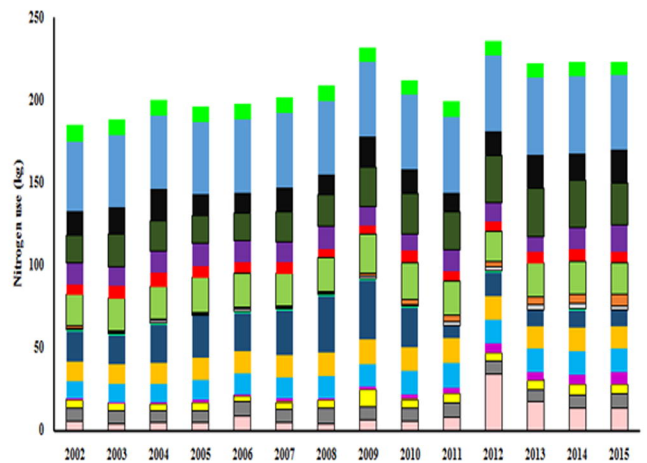

4

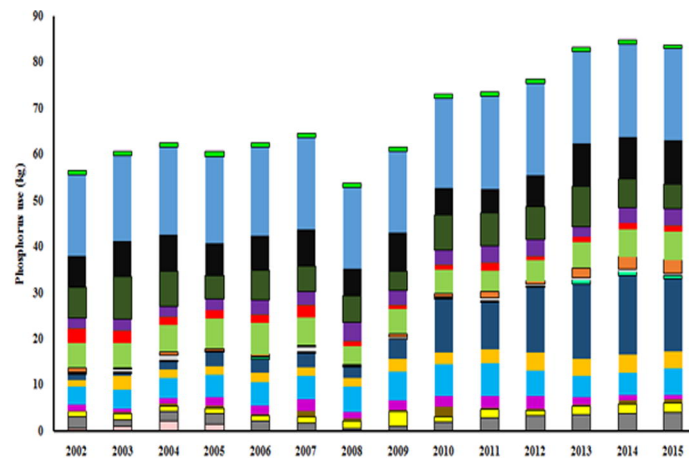

5

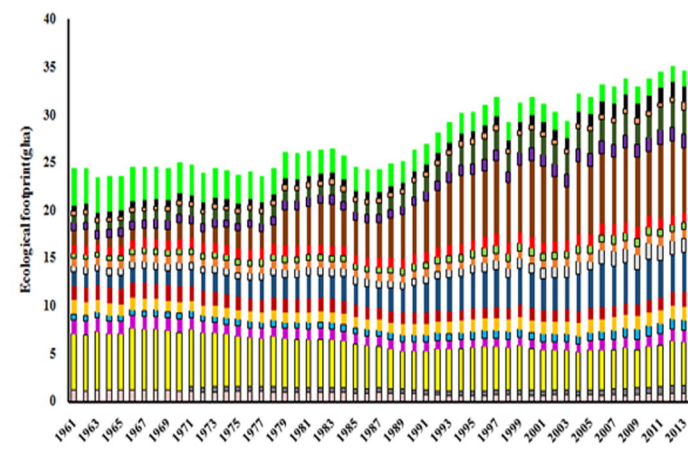

6

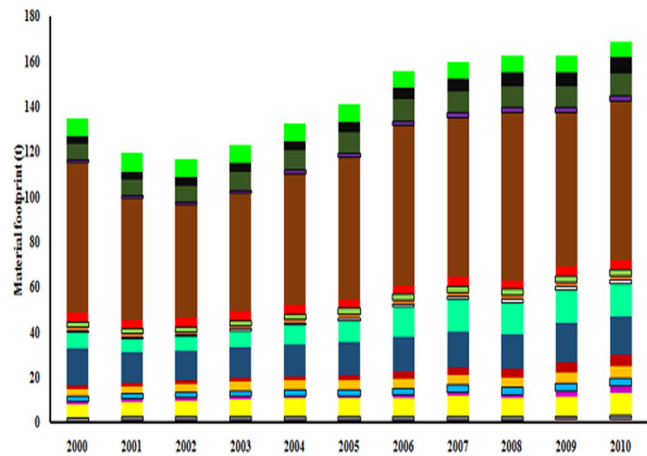

7

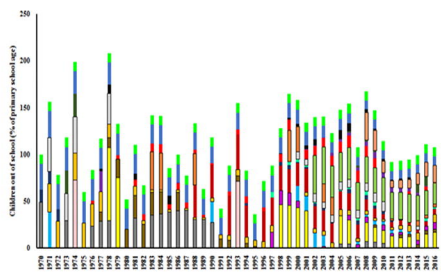

1

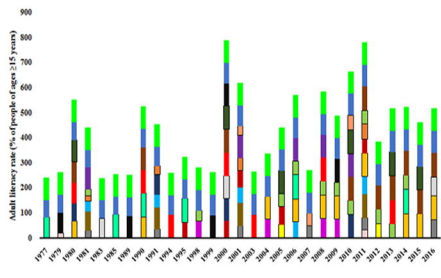

2

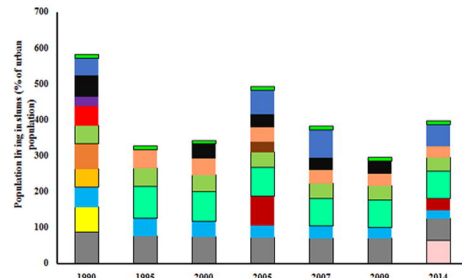

11

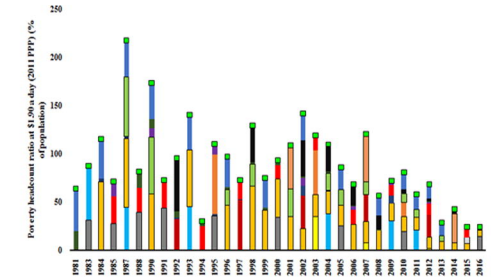

12

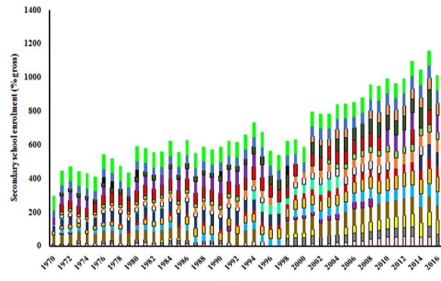

3

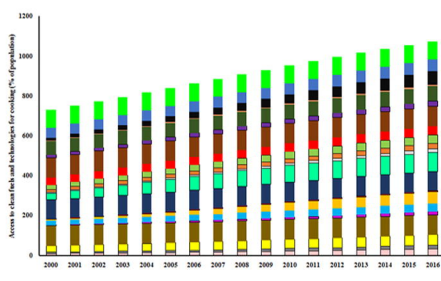

4

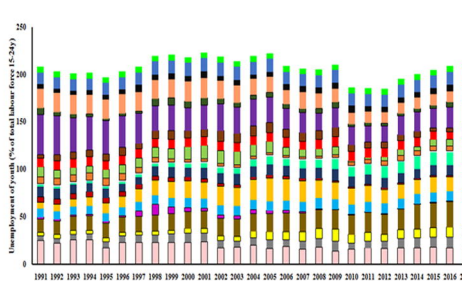

13

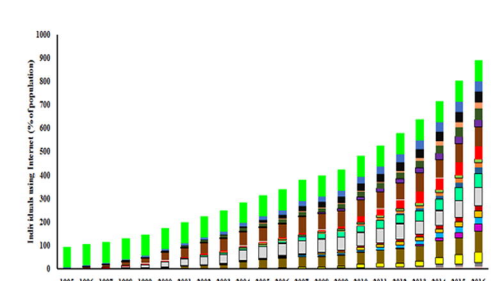

14

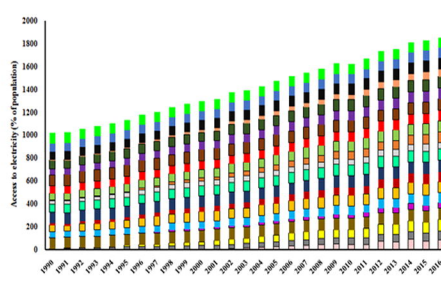

6

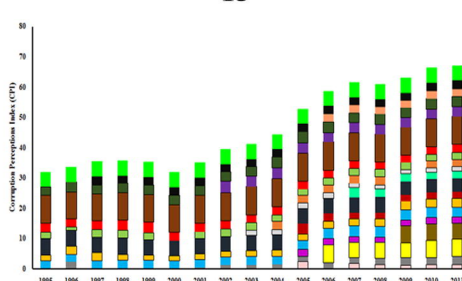

15

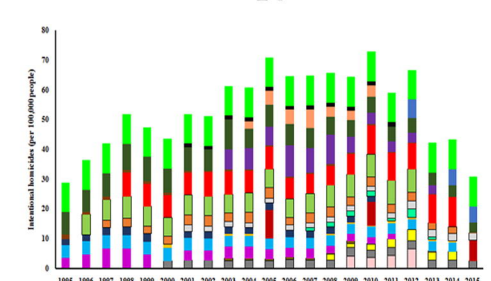

16

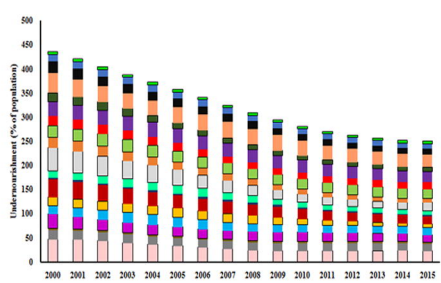

7

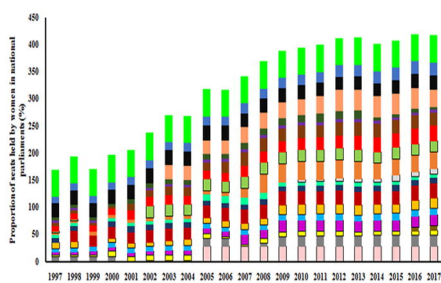

8

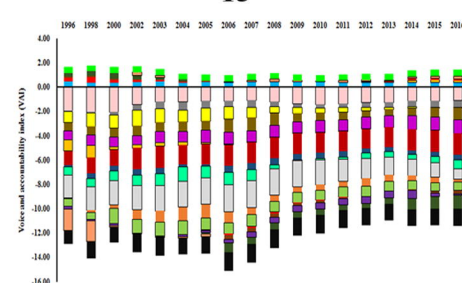

17

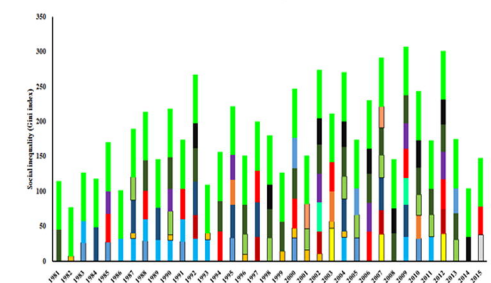

18

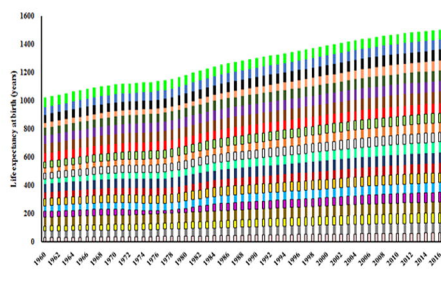

9

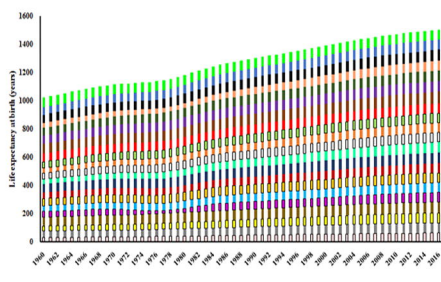

10

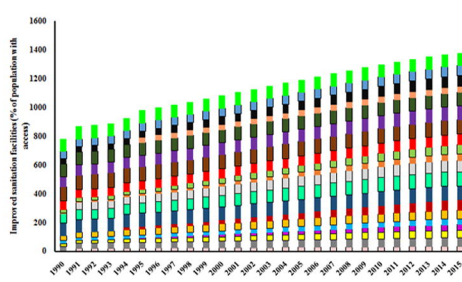

19

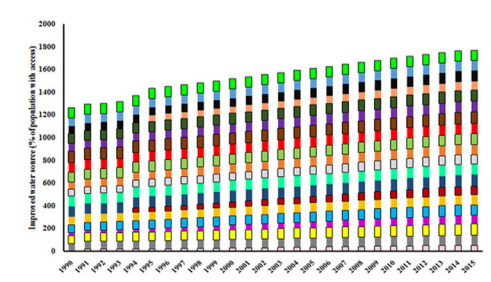

20

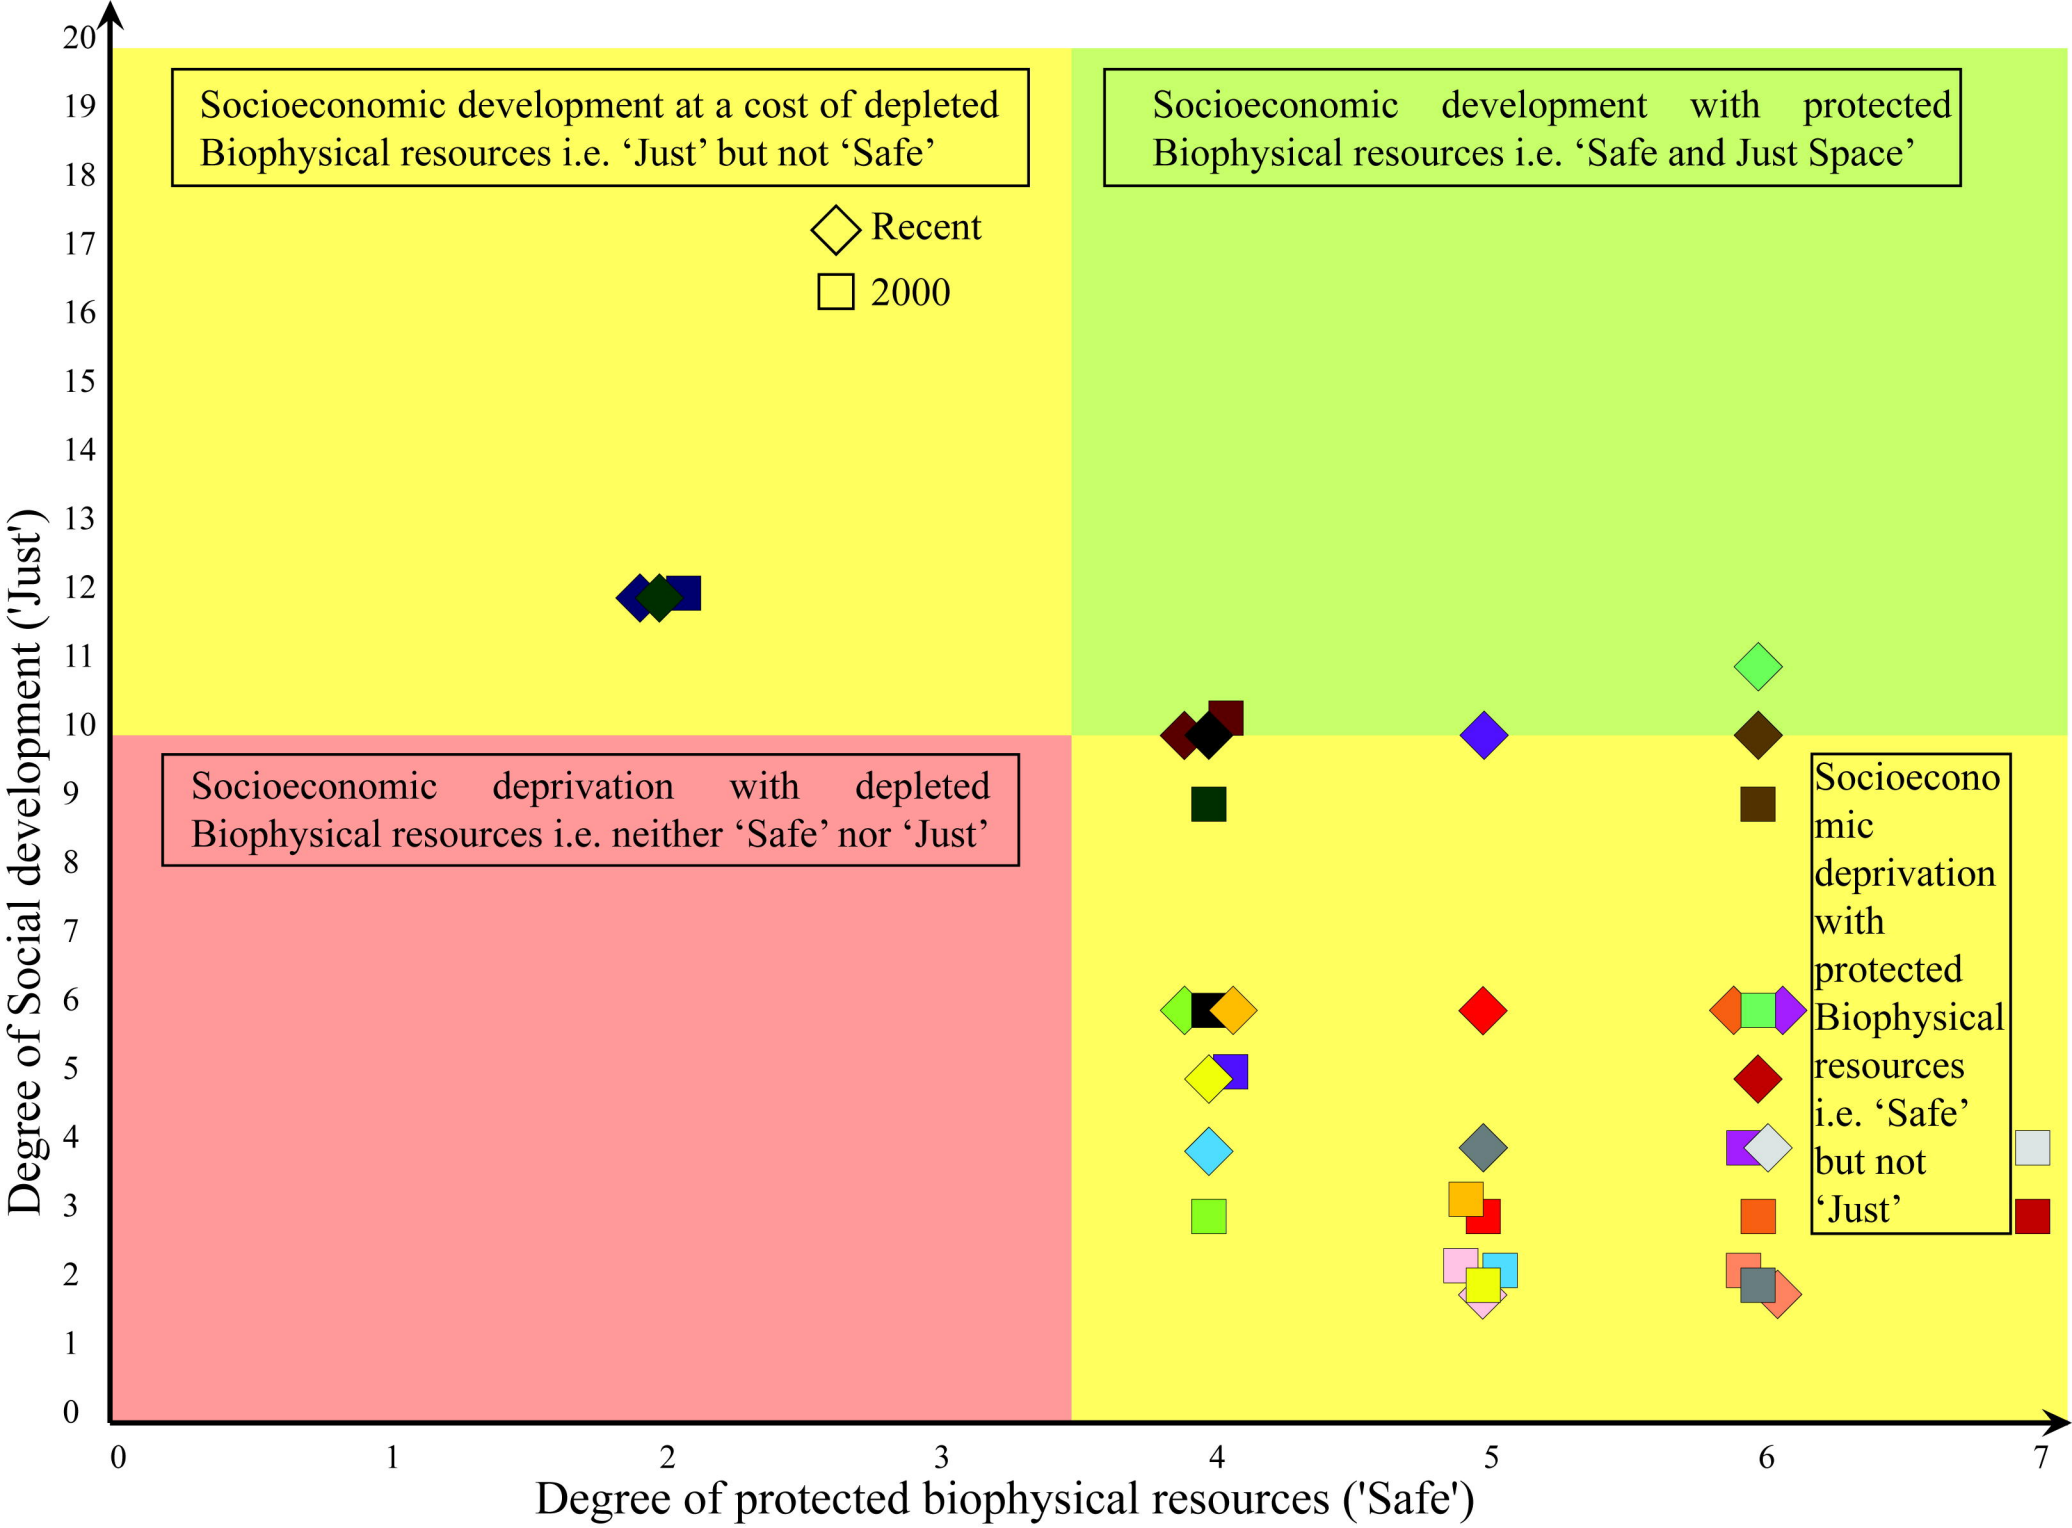

Source: https://www.biorxiv.org/content/10.1101/424200v1.full.pdf
